# Supplementary material for: Quantitatively differentiating foliar adhesion and absorption of different lead-based particles on Solanum melongena L.
Source: Royal Society of Chemistry journal article supplement (doi:10.1039/d3en00640a), 2023-12-14
Supplement: d3en00640a1.pdf [file d3en00640a1.pdf]

# Electronic Supplementary Information

## **Quantitatively differentiating foliar adhesion and absorption of different lead-based particles on *Solanum Melongena* L.**

*Bing Zhao*<sup>ac‡, f</sup>, *Siyu Zhang*<sup>a‡</sup>, *Xuejiao Zhang*<sup>a</sup>, *Qing Zhao*<sup>\*ab</sup>, *Jason C. White*<sup>d</sup>, *Fengchang Wu*<sup>e</sup>,  
*Baoshan Xing*<sup>f</sup>

<sup>a</sup> Key Laboratory of Pollution Ecology and Environmental Engineering, Institute of Applied Ecology, Chinese Academy of Sciences, Shenyang, 110016, China

<sup>b</sup> National-Regional Joint Engineering Research Center for Soil Pollution Control and Remediation in South China, Guangdong Key Laboratory of Integrated Agro-environmental Pollution Control and Management, Institute of Eco-environmental and Soil Sciences, Guangdong Academy of Sciences, Guangzhou, 510650, China

<sup>c</sup> University of Chinese Academy of Sciences, Beijing, 100049, China

<sup>d</sup> Department of Analytical Chemistry, The Connecticut Agricultural Experiment Station, New Haven, Connecticut 06504, United States

<sup>e</sup> State Key Laboratory of Environmental Criteria and Risk Assessment, Chinese Research Academy of Environmental Sciences, Beijing 100012, China

<sup>f</sup> Stockbridge School of Agriculture, University of Massachusetts, Amherst, MA 01003, USA

\*E-mail: zhaoqing@iae.ac.cn

‡ Bing Zhao and Siyu Zhang contributed equally to this paper

## List of Supplementary Data

|                                                                                                                         |    |
|-------------------------------------------------------------------------------------------------------------------------|----|
| <b>Text S1</b> Material.....                                                                                            | 6  |
| <b>Text S2</b> Synthesis of PbS particles.....                                                                          | 6  |
| <b>Text S3</b> Preparation of lead-based particles ( $\text{PbX}_n$ ) stock solution.....                               | 7  |
| <b>Text S4</b> Analytical conditions and quality control of inductively coupled plasma-mass spectrometry (ICP-MS).....  | 7  |
| <b>Text S5</b> X-ray photoelectron spectroscopy (XPS) analytic conditions.....                                          | 8  |
| <b>Text S6</b> Fourier transform infrared spectroscopy (FTIR) analytic conditions.....                                  | 9  |
| <b>Text S7</b> Plant cultivation.....                                                                                   | 9  |
| <b>Text S8</b> Scanning electron microscope-energy dispersive spectroscopy (SEM-EDS) sample preparation.....            | 9  |
| <b>Text S9</b> Transmission electron microscopy-energy dispersive spectroscopy (TEM-EDS) sample preparation.....        | 10 |
| <b>Text S10</b> Robustness evaluation of equation.....                                                                  | 10 |
| <b>Text S11</b> X-ray photoelectron spectroscopy (XPS) analysis.....                                                    | 11 |
| <b>Text S12</b> Fourier transform infrared spectroscopy (FTIR) analysis.....                                            | 12 |
| <b>Text S13</b> Raman spectroscopy analysis.....                                                                        | 12 |
| <b>Table S1</b> BET surface area of $\text{PbX}_n$ .....                                                                | 13 |
| <b>Table S2</b> Removal efficiency (%) of Pb species on eggplant leaves by deionized water.....                         | 13 |
| <b>Table S3</b> Percentages (%) of Pb species absorbed by eggplant leaves.....                                          | 13 |
| <b>Table S4</b> Percentages (%) of Pb species adhered to eggplant leaves.....                                           | 14 |
| <b>Table S5</b> Percentage ( $M_{\text{Adhesion}}/M_{\text{Uptake}}$ , %) of Pb species adhered to eggplant leaves..... | 14 |

|                                                                                                                                   |    |
|-----------------------------------------------------------------------------------------------------------------------------------|----|
| <b>Table S6</b> Percentage ( $M_{ABA}/M_{Absorption}$ , %) of Pb species absorbed via the cuticle pathway by eggplant leaves..... | 14 |
| <b>Table S7</b> Analysis of variance of multi linear regression.....                                                              | 15 |
| <b>Table S8</b> Pearson correlation between PbX <sub>n</sub> properties.....                                                      | 15 |
| <b>Table S9</b> Direct and indirect effect of PbX <sub>n</sub> properties on adhesion rate via path analysis.....                 | 16 |
| <b>Table S10</b> Direct and indirect effect of PbX <sub>n</sub> properties on absorption rate via path analysis.....              | 16 |
| <b>Table S11</b> Direct and indirect effect of PbX <sub>n</sub> properties on cuticular absorption rate via path analysis.....    | 16 |
| <b>Table S12</b> Direct and indirect effect of PbX <sub>n</sub> properties on stomatal absorption rate via path analysis.....     | 17 |
| <b>Fig. S1</b> Photos of eggplant plants.....                                                                                     | 17 |
| <b>Fig. S2</b> Schematic illustration of different treatments in the plant Pb exposure experiments.....                           | 17 |
| <b>Fig. S3</b> XRD spectrums and EDS images of PbS.....                                                                           | 18 |
| <b>Fig. S4</b> XPS survey spectrum of PbX <sub>n</sub> .....                                                                      | 18 |
| <b>Fig. S5</b> Fitting results of C 1s spectra of PbX <sub>n</sub> .....                                                          | 19 |
| <b>Fig. S6</b> Fitting results of O 1s spectra of PbX <sub>n</sub> .....                                                          | 19 |
| <b>Fig. S7</b> Fitting results of S 2p spectra of PbX <sub>n</sub> .....                                                          | 20 |
| <b>Fig. S8</b> Fitting results of Pb 4f spectra of PbX <sub>n</sub> .....                                                         | 20 |
| <b>Fig. S9</b> FTIR spectra of PbX <sub>n</sub> .....                                                                             | 21 |
| <b>Fig. S10</b> Raman spectra of PbX <sub>n</sub> .....                                                                           | 22 |
| <b>Fig. S11</b> Characterization of 10 mg Pb/L PbX <sub>n</sub> suspensions and salt solutions.....                               | 23 |



|                                                                                                                                                    |    |
|----------------------------------------------------------------------------------------------------------------------------------------------------|----|
| <b>Fig. S12 – S15</b> SEM-EDS images of eggplant leaves with different rinsing methods after 5 days of PbS-S exposure.....                         | 24 |
| <b>Fig. S16</b> SEM-EDS images of eggplant leaves after exposed to deionized water for 5 days.....                                                 | 28 |
| <b>Fig. S17 – S22</b> SEM-EDS images of PbX <sub>n</sub> in trichomes, stomata and cuticle of eggplant leaves with different cleaning methods..... | 29 |
| <b>Fig. S23</b> XPS spectra of different rinsing methods after PbS-S leaf exposure.....                                                            | 35 |
| <b>Fig. S24 – S29</b> Characterization images of eggplant leaves after exposure to PbX <sub>n</sub> .....                                          | 36 |
| <b>Fig. S30</b> TEM-EDS analysis of Pb-rich regions on eggplant leaves exposed to PbX <sub>n</sub> .....                                           | 42 |
| <b>Fig. S31</b> Mass of lead ( $M_{Pb}$ ).....                                                                                                     | 43 |
| <b>Fig. S32</b> Significance testing of mass or concentration of Pb in different organs of eggplant.....                                           | 43 |
| <b>Fig. S33</b> Significance testing of uptake mass of Pb in leaves after cleaned with 20 mM EDTA-2Na solution.....                                | 44 |
| <b>Fig. S34</b> Mass of Pb in 20 mM EDTA-2Na solution.....                                                                                         | 45 |
| <b>Fig. S35</b> Diagram of stomatal closure in leaves treated with 1 mM ABA.....                                                                   | 45 |
| <b>Fig. S36</b> Sizes of stomata on eggplant leaves.....                                                                                           | 45 |
| <b>Fig. S37</b> Variations of adhesion/absorption rates or wax/stomatal absorption rates of Pb species with single surface property.....           | 46 |

### **Text S1 Materials**

Lead acetate of analytical reagent were obtained from Fu Chen (Tianjin) Chemical Reagent Co., Ltd. Cysteine (99%), thioacetamide ( $\geq 98.0\%$ ), ethanediol (98%) and cetyltrimethylammonium bromine (99%) were from Shanghai Aladdin Biochemical Technology Co., Ltd. Chloroform ( $\geq 99.0\%$ ), EDTA-2Na ( $\geq 99.9\%$ ) was from Shanghai Aladdin Biochemical Technology Co., Ltd. Nitric acid ( $\text{HNO}_3$ , 69% ~ 70%, trace metal < 1 ppb) of guaranteed reagent grade was obtained from ANPEL Laboratory Technologies (Shanghai) Inc. Perchloric acid ( $\text{HClO}_4$ , 70% ~ 72%) and hydrogen peroxide ( $\text{H}_2\text{O}_2$ ,  $\geq 30\%$ ) of guaranteed reagent grade were obtained from Tianjin Kemiou Chemical Reagent Co., Ltd. Phosphate buffered solution (PBS, 0.1 M) was purchased from Beijing LabLead Biotechnology Co., Ltd. Osmium tetroxide was prepared by Beijing Electron Microscopy China Technology Co., Ltd. Glutaraldehyde fixation solution (2%) were obtained from Beijing Leagene Biotechnology Co., Ltd. Ethanol (99.7%) was from Chengdu Kelong Chemical Co., Ltd. Standard substance citrus (GBW10020) and celery (GBW10048) leaves were purchased from National Sharing Platform for Reference Materials. Ultrapure water (resistivity  $\geq 18.2 \text{ M}\Omega\cdot\text{cm}$ ) was prepared by Milli-Q Direct 8 (Merck Millipore, Germany).

### **Text S2 Synthesis of PbS particles**

Two hydrophilic-hydrophobic property of lead sulfide nanoparticles (PbS) were prepared in laboratory following previously reported methods.<sup>1,2</sup> Hydrophobic PbS (PbS-S) were prepared by mixing 0.379 g lead acetate, 0.152 g thioacetamide and 0.364 g cetyltrimethylammonium bromine in 40 mL water. The mixture was stirred for 30 min, heated for 14 h at 120 °C, and then cooled to room temperature. Hydrophilic PbS (PbS-Q) were prepared by mixing 0.379 g lead acetate and

0.121 g cysteine in 10 mL ethanediol and 30 mL water. The mixture was stirred for 30 min, heated for 17 h at 150 °C, and cooled to room temperature.

Black solid products were separated by centrifugation at 3500 rpm for 20 min. Precipitates were washed three times with distilled water and ethanol, and then dried at room temperature for 5 h in a vacuum-dryer. Prepared PbS collected in sealed, oxygen-free centrifuge tubes.

### **Text S3** Preparation of lead-based particles ( $\text{PbX}_n$ ) stock solution

The as-prepared PbS were sonicated at 800 W in a water bath ultrasonicator (KQ-300B, Kunshan, China) for 3 h to obtain 1000 mg Pb L<sup>-1</sup> evenly dispersed suspension. Bulk Pb oxides were ground into large sheets to facilitate dispersing, and then sonicated at 720 W with an immersing probe in ultrasonic cell disrupter (1800-99, Biosafe, China) for 3 h to obtain 2000 mg Pb L<sup>-1</sup> suspension.

Two dissolvable Pb salts ( $\text{PbSO}_4$  and  $\text{PbCl}_2$ ) were used for comparison with the particles. The salts were dissolved in distilled water directly with assistance of ultrasonication to obtain 100 mg Pb L<sup>-1</sup> solution. Before the plant experiment, the  $\text{PbX}_n$  suspension/solution was kept sealed and stored at 4 °C.

### **Text S4** Analytical conditions and quality control of inductively coupled plasma-mass spectrometry (ICP-MS)

Working conditions: sampling depth: 3.61 mm; cooling gas flow: 13.0 L min<sup>-1</sup>; auxiliary gas flow: 0.60 L min<sup>-1</sup>; atomization gas flow: 0.92 L min<sup>-1</sup>; analysis pressure:  $2.6 \times 10^{-6}$  mbar; diffusion pressure: 1.8 mbar; atomization pressure: 2.68 bar; power: 1390 W; reflected power: 0.0 W; data

acquisition method: scanning. Analysis time for each sample: 90 s. The detection limit was 0.1  $\mu\text{g L}^{-1}$ , and the quantitation limit was 1  $\mu\text{g L}^{-1}$ .

Before testing the sample, the ICP-MS was calibrated with the calibration solution. A series of Pb standard gradient dilution solutions are introduced into the instrument to form a linear relationship ( $r > 0.9999$ ). Pb Standard samples were repeatedly measured every 20 experimental samples for calibration, and error values were within  $\pm 10\%$ . Relative standard deviation (RSD) of sample concentration was  $< 20\%$ . Reagent and plant blank controls amended with distilled water were analyzed each time with the samples. Recoveries of the digestion and analytical procedures were evaluated by treating standard reference leaves (citrus and celery) following the same procedure.

#### **Text S5** X-ray photoelectron spectroscopy (XPS) analytic conditions

An appropriate amount of sample was pressed onto a sample plate, and the sample was placed in the sample chamber of Thermo Scientific K-Alpha XPS instrument. When the pressure of the sample chamber was less than  $2.0 \times 10^{-7}$  mbar, the sample was sent to the analysis chamber. The spot size was 400  $\mu\text{m}$ , the operating voltage was 12 kV, and the filament current was 6 mA. The full scan energy is 150 eV and the step length is 1 eV. The narrow-spectrum scan has a pass energy of 50 eV and a step length of 0.1 eV. Default orbit tests the fine spectra of C, O, Pb, and S elements. The binding energy with surface contamination C1s (284.8 eV) was used as the standard.

#### **Text S6** Fourier transform infrared spectroscopy (FTIR) analytic conditions

In a dry environment, a predetermined amount of sample and an appropriate amount of dry potassium bromide powder were added to the mortar, fully ground multiple times, and then placed on a tablet press (pressed into a transparent sheet). The background is first collected during the test, and then the infrared spectrum of the sample is collected. The resolution is  $4\text{ cm}^{-1}$ , the number of scans is 32, and the test wave number range is  $400\text{-}4000\text{ cm}^{-1}$ .

#### **Text S7 Plant cultivation**

A local cultivar of eggplant (*Solanum melongena* L.) was selected in the foliar application experiments. Seeds were cultivated in plastic pots (diameter: 10 cm; height: 9 cm) filled with nutrient substrates (pH: 6.5 ~ 6.8; N, P, K  $\geq 12\text{ g kg}^{-1}$ ; organic matter contents  $\geq 40\%$ ; Si  $\geq 0.3\text{ g/kg}$ ). In each pot, 3 seeds were cultivated at initial, and two of them were removed after germination. All plants were placed in growth chambers (day/night period: 16 h/8 h; temperature:  $25\text{ }^{\circ}\text{C}/22\text{ }^{\circ}\text{C}$ ; humidity: 45%/65%) with a photosynthetic luminous power density of  $14.5\text{ W m}^{-2}$  in day time period. Plants were watered with tap water ( $\text{Pb} < 0.1\text{ }\mu\text{g L}^{-1}$ ) every 2 days to keep humidity of the nutrient substrates at 40%.

#### **Text S8 Scanning electron microscope-energy dispersive spectroscopy (SEM-EDS) sample preparation**

Firstly, four leaves of the same age were selected and treated separately, including not treated, washed with deionized water, washed with 20 mM EDTA-2Na solution, and extracted with chloroform. The leaves were cut into small pieces ( $\sim 4 \times 4\text{ mm}^2$ ), and then immersed in 2% glutaraldehyde for 2 h, washed three times with 0.1 M PBS, and post-fixed with 1% osmium tetroxide in 0.1 M PBS for 1 h at  $4\text{ }^{\circ}\text{C}$ . The specimens were rinsed with PBS and dehydrated in

sequential-graded concentrations of ethanol (30%, 50%, 70%, 80%, 90%, and 100%). Dehydrated samples were freeze dried, and sprayed with gold-palladium by sputter coater (SD-900C, Vision Precision Instruments, China). Structure and surface characteristics of leaves were examined using SEM-EDS operating at an accelerating voltage of 3 kV under ultra-high vacuum conditions ( $9.6 \times 10^{-5}$  Pa) and in secondary electron mode.

**Text S9** Transmission electron microscopy-energy dispersive spectroscopy (TEM-EDS) sample preparation

Plant leaves cut into small pieces (1 ~ 2 mm in length). To determine Pb localization within plant leaves, plant samples were fixed in 3% glutaraldehyde in 0.2 M phosphate buffer (pH 7.2) at 4 °C overnight, washed 3 times with 0.1 M phosphate buffer (pH 7.2), and post-fixed with 1% osmium tetroxide in 0.1 M phosphate buffer (pH 7.2) for 1 h at 4 °C. They were then dehydrated in a graded series of ethanol (50%, 70%, 80%, 90%, 95% and 100%), 15 min for each step. The dehydrated samples were finally embedded in 100% Spurr resin (Spurr, 1969) and sectioned (90 nm thickness) for TEM (JEOL JEM-2100, Japan) at an accelerating voltage of 200 kV. Elemental composition in the selected areas was determined by EDS coupled to the JEM-2100 (JEOL, Japan).

**Text S10** Robustness evaluation of equation

The robustness of Eqs. (3) ~ (6) was evaluated through an initial two step development: (1) splitting the data into training and validation sets validating the data via internal and external certification. To split the data into training and validation sets, we first sorted the 25 data based on decreasing maximum  $Ad$ ,  $Ab$ ,  $CAb$  and  $SAb$  value. Second, the data were split into three sets: the lowest  $Ad$ ,  $Ab$ ,  $CAb$  and  $SAb$  value were grouped into the validation set  $V_2$  to represent the data

that are not within the range of the training set. The remaining 23 data molecules were split into two sets: training set (T) and the validation set ( $V_1$ ) following pattern T-T-T-T-T-T-T- $V_1$ -T-T-T-T-T-T-T- $V_1$ -T-T-T-T-T-T-T to ensure the  $V_1$  set is evenly distributed in the training set.

### Text S11 X-ray photoelectron spectroscopy (XPS) analysis

XPS survey spectra of  $PbX_n$  showed that the four elemental orbitals of the particle surface were C 1s, O 1s, Pb 4f and S 2p, respectively (Fig. S4). The C 1s spectrum of  $PbX_n$  was fitted with two peaks after charge calibration (Fig. S5): the first peak at 284.8 eV was attributed to C-C; the second peak of PbS at 287.2 eV ascribed to C-O single bonds; and the second peak of  $Pb_3O_4$ ,  $PbO_2$  and PbO at 288.9 ~ 289.0 eV to O=C-O.<sup>3-6</sup> The first peak and the second peak of PbS were likely the result of adventitious carbon contamination or the background of the XPS test,<sup>7,8</sup> while the second peak of  $Pb_3O_4$ ,  $PbO_2$  and PbO was due to carbonate ions.<sup>9</sup> Carbonate formed from the reaction of oxidized lead with atmospheric  $CO_2$ .<sup>10</sup> As shown in Fig. S6, the decomposed O 1s XPS spectra of  $PbX_n$  presents as three distinct varieties of oxygen, involving metal oxides (528.9 ~ 530.0 eV), hydroxyl bond (531.0 ~ 531.7 eV) and adsorbed water/hydroxides (532.2 eV).<sup>11-13</sup> For the two PbS (Fig. S7), S 2p peaks having a spin-orbit doublet consisting of S 2p<sub>3/2</sub> and S 2p<sub>1/2</sub> ( $\Delta = 1.2$  or 1.3 eV). In this regard, the S 2p<sub>3/2</sub> peaks at 160.7 eV and 160.6 eV can be assigned to sulfide in galena, which agrees well with literature (160.80 and 160.70 eV).<sup>14,15</sup> The Pb 4f spectra of  $PbX_n$  consists of spin-orbit splitting into Pb 4f<sub>7/2</sub> and Pb 4f<sub>5/2</sub> components (Fig. S8). The Pb 4f<sub>7/2</sub> peaks at 137.2 ~ 138.9 eV could be attributed to lead sulfides (Pb-S) or Pb-O-containing species (Fig. S8).<sup>13,16-18</sup> Previous studies have shown that the binding energies of Pb oxides/hydroxides (*e.g.* PbO,  $PbO_2$ , and  $Pb(OH)_2$ ) and PbS are almost the same.<sup>19</sup>

**Text S12.** Fourier transform infrared spectroscopy (FTIR) analysis

As shown in Fig. S9, the frequencies due to the molecules of PbS were confirmed by the peaks at  $700 \sim 600$  and  $1100 \sim 1000 \text{ cm}^{-1}$ .<sup>20,21</sup> The oxidized lead characteristic peaks at  $460 \sim 400 \text{ cm}^{-1}$  and  $550 \sim 510 \text{ cm}^{-1}$ , assigned to the vibration modes of Pb-O bond.<sup>22,23</sup> The response at  $1000 \sim 800 \text{ cm}^{-1}$  may also be the characteristic peak of Pb.<sup>21,24</sup> The peak at  $\sim 1527 \text{ cm}^{-1}$  was attributed to lead compounds or  $\text{Pb}^{2+}$ .<sup>25,26</sup>  $1500 \sim 1300 \text{ cm}^{-1}$  was the in-plane bending vibration peaks of  $\delta(\text{O-H})$ .<sup>27</sup>  $1300 \sim 900$  and  $900 \sim 500 \text{ cm}^{-1}$  were the stretching vibration peak of  $\nu[\text{C-O(H)}]$  and the out-of-plane bending vibration peaks of  $\gamma(\text{C-H})$ , respectively.<sup>26,28</sup>  $\delta(\text{O-H})$  in the five lead species comes from hydroxide in water, while  $\nu[\text{C-O(H)}]$  and  $\gamma(\text{C-H})$  in PbS-Q and PbS-S are related to particle synthesis process.

**Text S13** Raman spectroscopy analysis

As shown in Fig. S10, the Raman peaks occurred at  $78 \sim 81 \text{ cm}^{-1}$  and  $135 \sim 144 \text{ cm}^{-1}$  correspond to a combination of longitudinal and transverse acoustic modes, which are typical peaks of inorganic lead compounds.<sup>29,30</sup> Peak observed at  $966$  and  $969 \text{ cm}^{-1}$  may be due to laser-induced degradation of PbS.<sup>31,32</sup> Pawar *et al.*<sup>30</sup> discovered  $131$ ,  $426$  and  $962 \text{ cm}^{-1}$  as typical peaks for PbS nanostars. The characteristic peaks that correspond to the  $\text{Pb}_3\text{O}_4$  appear at  $542 \text{ cm}^{-1}$ , and were attributed to the symmetric bending vibrational modes of Pb (II, IV)-O bonds.<sup>33-35</sup> Oxidized lead characteristic peaks at  $\sim 270$ ,  $319$  and  $335 \text{ cm}^{-1}$ , assigned to the vibration modes of Pb-O bond, were matched well with the Raman standard peaks.<sup>22,23,36</sup>



**Table S1** BET surface area of PbX<sub>n</sub>

| Treatment                      | BET surface area/m <sup>2</sup> g <sup>-1</sup> |
|--------------------------------|-------------------------------------------------|
| PbS-S                          | 3.1                                             |
| PbS-Q                          | 7.6                                             |
| Pb <sub>3</sub> O <sub>4</sub> | 5.8                                             |
| PbO <sub>2</sub>               | 0.8                                             |
| PbO                            | 5.7                                             |

**Table S2** Removal efficiency (%) of Pb species on eggplant leaves by deionized water

| Day              | PbS-S | PbS-Q | Pb <sub>3</sub> O <sub>4</sub> | PbO <sub>2</sub> | PbO | PbSO <sub>4</sub> | PbCl <sub>2</sub> |
|------------------|-------|-------|--------------------------------|------------------|-----|-------------------|-------------------|
| 2 <sup>nd</sup>  | 15    | 27    | 13                             | 12               | 30  | 17                | 38                |
| 4 <sup>th</sup>  | 9     | 25    | 15                             | 14               | 17  | 13                | 28                |
| 6 <sup>th</sup>  | 10    | 13    | 14                             | 11               | 16  | 11                | 14                |
| 8 <sup>th</sup>  | 4     | 6     | 18                             | 21               | 16  | 11                | 16                |
| 11 <sup>th</sup> | 6     | 7     | 7                              | 9                | 11  | 11                | 15                |
| 15 <sup>th</sup> | 5     | 7     | 10                             | 10               | 10  | 11                | 16                |
| 22 <sup>nd</sup> | 4     | 6     | 9                              | 6                | 4   | 8                 | 18                |

**Table S3** Percentages (%) of Pb species absorbed by eggplant leaves

| Days             | PbS-S | PbS-Q | Pb <sub>3</sub> O <sub>4</sub> | PbO <sub>2</sub> | PbO | PbSO <sub>4</sub> | PbCl <sub>2</sub> |
|------------------|-------|-------|--------------------------------|------------------|-----|-------------------|-------------------|
| 2 <sup>nd</sup>  | 57    | 34    | 23                             | 6                | 4   | 0.4               | 4                 |
| 4 <sup>th</sup>  | 59    | 40    | 20                             | 7                | 5   | 2                 | 4                 |
| 6 <sup>th</sup>  | 59    | 31    | 16                             | 14               | 5   | 4                 | 8                 |
| 8 <sup>th</sup>  | 57    | 35    | 15                             | 12               | 10  | 3                 | 7                 |
| 11 <sup>th</sup> | 59    | 36    | 12                             | 13               | 9   | 3                 | 6                 |
| 15 <sup>th</sup> | 60    | 34    | 13                             | 15               | 9   | 3                 | 8                 |
| 22 <sup>nd</sup> | 64    | 34    | 14                             | 15               | 9   | 4                 | 9                 |

**Table S4** Percentages (%) of Pb species adhered to eggplant leaves

| Days             | PbS-S | PbS-Q | Pb <sub>3</sub> O <sub>4</sub> | PbO <sub>2</sub> | PbO | PbSO <sub>4</sub> | PbCl <sub>2</sub> |
|------------------|-------|-------|--------------------------------|------------------|-----|-------------------|-------------------|
| 2 <sup>nd</sup>  | 29    | 39    | 63                             | 82               | 66  | 82                | 59                |
| 4 <sup>th</sup>  | 32    | 35    | 65                             | 80               | 79  | 85                | 68                |
| 6 <sup>th</sup>  | 32    | 56    | 70                             | 75               | 79  | 85                | 78                |
| 8 <sup>th</sup>  | 39    | 58    | 67                             | 67               | 74  | 86                | 77                |
| 11 <sup>th</sup> | 35    | 57    | 81                             | 78               | 80  | 86                | 79                |
| 15 <sup>th</sup> | 35    | 58    | 77                             | 75               | 81  | 86                | 76                |
| 22 <sup>nd</sup> | 32    | 60    | 77                             | 78               | 88  | 87                | 73                |

**Table S5** Percentages ( $M_{\text{Adhesion}}/M_{\text{Uptake}}$ , %) of Pb species adhered to eggplant leaves

| Days             | PbS-S | PbS-Q | Pb <sub>3</sub> O <sub>4</sub> | PbO <sub>2</sub> | PbO | PbSO <sub>4</sub> | PbCl <sub>2</sub> |
|------------------|-------|-------|--------------------------------|------------------|-----|-------------------|-------------------|
| 2 <sup>nd</sup>  | 33    | 52    | 72                             | 92               | 93  | 98                | 92                |
| 4 <sup>th</sup>  | 35    | 47    | 76                             | 92               | 94  | 97                | 94                |
| 6 <sup>th</sup>  | 35    | 64    | 81                             | 84               | 93  | 95                | 91                |
| 8 <sup>th</sup>  | 40    | 62    | 82                             | 84               | 87  | 96                | 91                |
| 11 <sup>th</sup> | 37    | 61    | 87                             | 86               | 89  | 96                | 92                |
| 15 <sup>th</sup> | 37    | 63    | 85                             | 83               | 90  | 96                | 90                |
| 22 <sup>nd</sup> | 33    | 63    | 84                             | 83               | 91  | 95                | 89                |

**Table S6** Percentages ( $M_{\text{ABA}}/M_{\text{Absorption}}$ , %) of Pb species absorbed via the cuticle pathway by eggplant leaves

| Days            | PbS-S | PbS-Q | Pb <sub>3</sub> O <sub>4</sub> | PbO <sub>2</sub> | PbO | PbSO <sub>4</sub> | PbCl <sub>2</sub> |
|-----------------|-------|-------|--------------------------------|------------------|-----|-------------------|-------------------|
| 2 <sup>nd</sup> | 43    | 48    | 46                             | 36               | 43  | 127               | 80                |
| 4 <sup>th</sup> | 41    | 45    | 51                             | 30               | 31  | 119               | 73                |
| 6 <sup>th</sup> | 37    | 69    | 57                             | 19               | 37  | 101               | 50                |

**Table S7** Analysis of variance of multi linear regression

|            |            | Sum of Squares | df | Mean Square | F       | Sig.  |
|------------|------------|----------------|----|-------------|---------|-------|
| <i>Ad</i>  | Regression | 6654.507       | 4  | 1663.627    | 425.083 | 0.000 |
|            | Residual   | 78.273         | 20 | 3.914       |         |       |
|            | Total      | 6732.780       | 24 |             |         |       |
| <i>Ab</i>  | Regression | 8942.801       | 4  | 2235.700    | 411.095 | 0.000 |
|            | Residual   | 108.768        | 20 | 5.438       |         |       |
|            | Total      | 9051.569       | 24 |             |         |       |
| <i>CAb</i> | Regression | 7514.243       | 3  | 2504.748    | 69.509  | 0.000 |
|            | Residual   | 756.737        | 21 | 36.035      |         |       |
|            | Total      | 8270.980       | 24 |             |         |       |
| <i>SAb</i> | Regression | 7514.243       | 3  | 2504.748    | 69.509  | 0.000 |
|            | Residual   | 756.737        | 21 | 36.035      |         |       |
|            | Total      | 8270.980       | 24 |             |         |       |

**Table S8** Pearson correlation between PbX<sub>n</sub> properties

|              | log <i>L</i> | log <i>H</i> | log <i>Z</i> | log <i>C</i> | log <i>B</i> | log <i>K</i> |
|--------------|--------------|--------------|--------------|--------------|--------------|--------------|
| log <i>L</i> | 1            |              |              |              |              |              |
| log <i>H</i> | 0.953**      | 1            |              |              |              |              |
| log <i>Z</i> | 0.821**      | 0.785**      | 1            |              |              |              |
| log <i>C</i> | -0.385       | -0.500*      | -0.129       | 1            |              |              |
| log <i>B</i> | 0.124        | 0.248        | -0.327       | -0.841**     | 1            |              |
| log <i>K</i> | -0.285       | -0.018       | -0.488*      | -0.471*      | 0.711**      | 1            |

\*\* Significant correlation at 0.01 level (bilateral)

\* Significant correlation at 0.05 level (bilateral)

**Table S9** Direct and indirect effect of PbX<sub>n</sub> properties on adhesion rate via path analysis

| Variables    | Direct | Indirect     |              |              |              | Total  |
|--------------|--------|--------------|--------------|--------------|--------------|--------|
|              |        | log <i>Z</i> | log <i>C</i> | log <i>K</i> | log <i>H</i> |        |
| log <i>Z</i> | 0.940  | —            | 0.080        | 0.164        | -0.299       | 0.885  |
| log <i>C</i> | -0.623 | -0.121       | —            | 0.159        | 0.191        | -0.394 |
| log <i>K</i> | -0.337 | -0.459       | 0.293        | —            | 0.007        | -0.496 |
| log <i>H</i> | -0.381 | 0.738        | 0.312        | 0.006        | —            | 0.675  |

**Table S10** Direct and indirect effect of PbX<sub>n</sub> properties on absorption rate via path analysis

| Variables    | Direct | Indirect     |              |              |              | Total  |
|--------------|--------|--------------|--------------|--------------|--------------|--------|
|              |        | log <i>Z</i> | log <i>C</i> | log <i>K</i> | log <i>H</i> |        |
| log <i>Z</i> | -0.832 | —            | -0.091       | -0.184       | 0.253        | -0.854 |
| log <i>C</i> | 0.703  | 0.107        | —            | -0.178       | -0.161       | 0.471  |
| log <i>K</i> | 0.377  | 0.406        | -0.331       | —            | -0.006       | 0.446  |
| log <i>H</i> | 0.322  | -0.653       | -0.352       | -0.007       | —            | -0.690 |

**Table S11** Direct and indirect effect of PbX<sub>n</sub> properties on cuticular absorption rate via path analysis

| Variables    | Direct | Indirect     |              |              | Total  |
|--------------|--------|--------------|--------------|--------------|--------|
|              |        | log <i>B</i> | log <i>L</i> | log <i>Z</i> |        |
| log <i>B</i> | 1.261  | —            | -0.146       | -0.304       | 0.811  |
| log <i>L</i> | -1.175 | 0.156        | —            | 0.764        | -0.255 |
| log <i>Z</i> | 0.930  | -0.412       | -0.965       | —            | -0.447 |

**Table S12** Direct and indirect effect of  $PbX_n$  properties on stomatal absorption rate via path analysis

| Variables | Direct | Indirect |          |          | Total  |
|-----------|--------|----------|----------|----------|--------|
|           |        | $\log B$ | $\log L$ | $\log Z$ |        |
| $\log B$  | -1.261 | —        | 0.146    | 0.304    | -0.811 |
| $\log L$  | 1.175  | -0.156   | —        | -0.764   | 0.255  |
| $\log Z$  | -0.930 | 0.412    | 0.965    | —        | 0.447  |

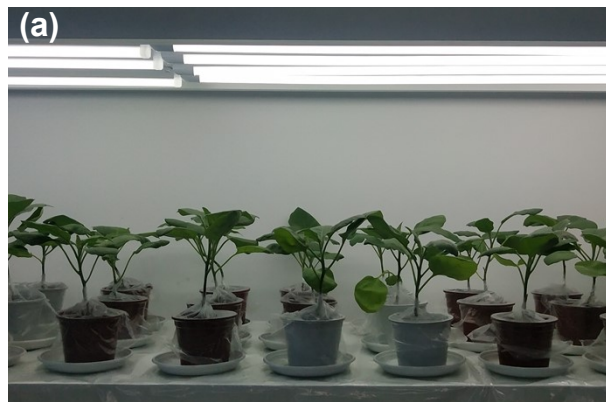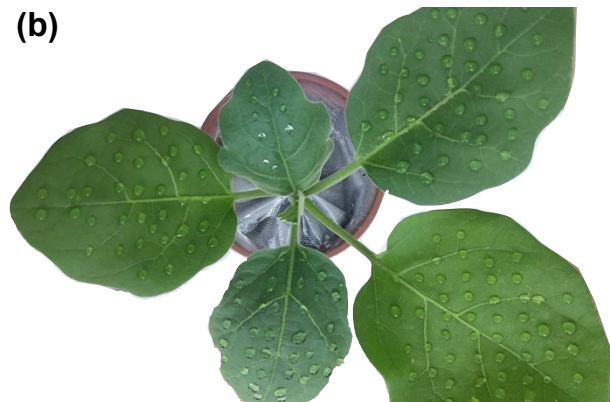

**Fig. S1** Photographs of the plants (a) and eggplant leaves after foliar application of  $10 \text{ mg Pb L}^{-1}$  dispersion (b).

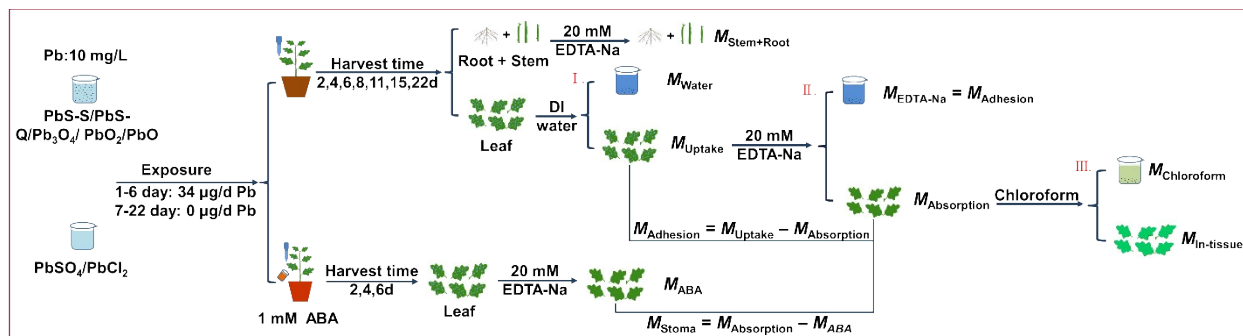

**Fig. S2** Schematic illustration of different treatments in the plant Pb exposure experiments.  $M_{\text{Uptake}}$ : Mass of Pb in leaves after washing with deionized water;  $M_{\text{Water}}$ : Mass of Pb in deionized water after leaf washing;  $M_{\text{Absorption}}$ : Mass of Pb in leaves after washing with 20 mM EDTA-2Na solution;  $M_{\text{Adhesion}} = M_{\text{EDTA-2Na}}$ : Mass of Pb in EDTA-2Na solution after leaf washing;  $M_{\text{Stem+Root}}$ : Mass of Pb in stems and roots;  $M_{\text{Chloroform}}$ : Mass of Pb in chloroform after leaf washing;  $M_{\text{In-tissue}}$ : Mass of Pb in leaves after chloroform washing;  $M_{\text{ABA}}$ : Absorption mass of Pb in leaves after 1 mM ABA was applied to the root of eggplant, that is, the mass of Pb absorbed by leaves through wax;  $M_{\text{Stoma}}$ : The leaves absorb the mass of Pb through stomata.

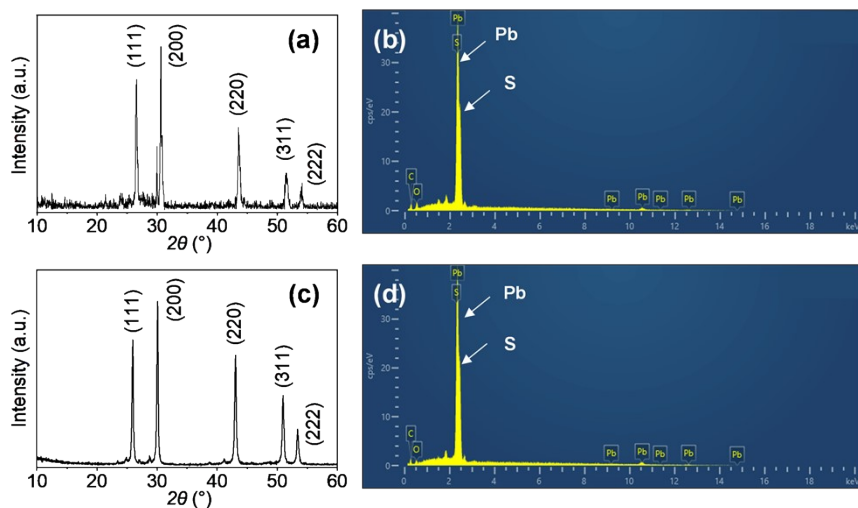

**Fig. S3** XRD spectrum (a) and EDS image (b) of as-prepared PbS-S; XRD spectrum (c) and EDS image (d) of as-prepared PbS-Q.

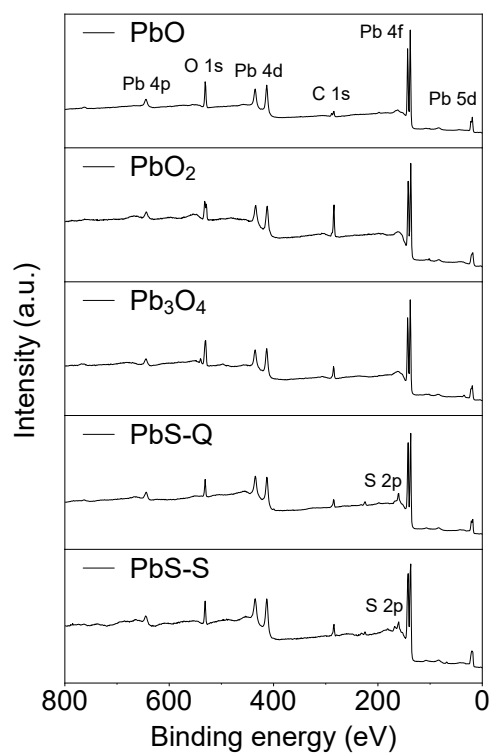

**Fig. S4** XPS survey spectra of  $\text{PbX}_n$ .

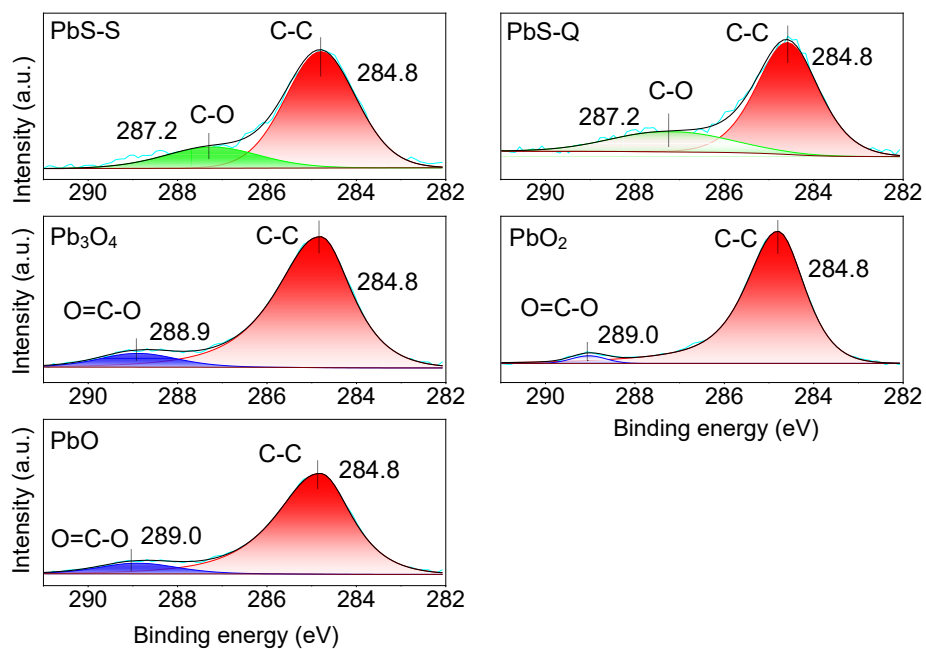

**Fig. S5** Fitting results of C 1s spectra of PbX<sub>n</sub>.

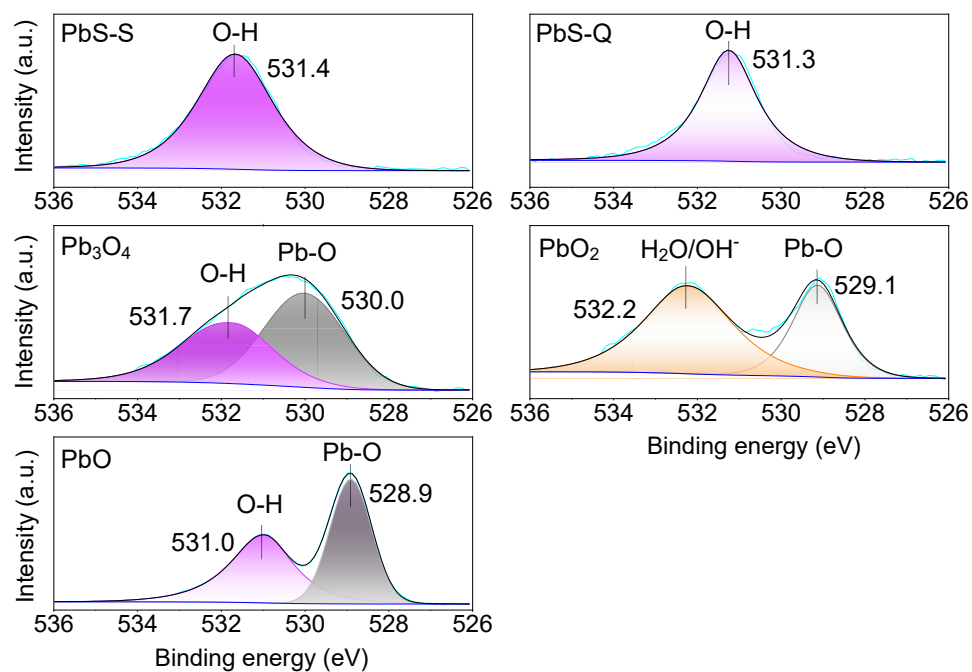

**Fig. S6** Fitting results of O 1s spectra PbX<sub>n</sub>.



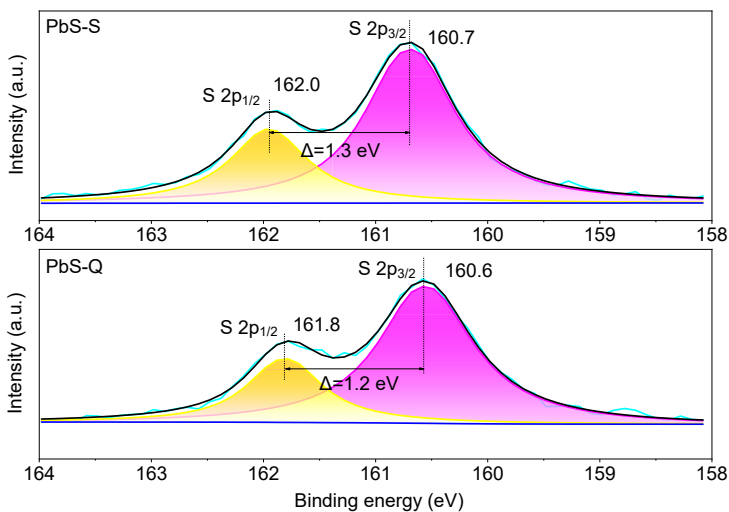

**Fig. S7** Fitting results of S 2p spectra of PbX<sub>n</sub>.

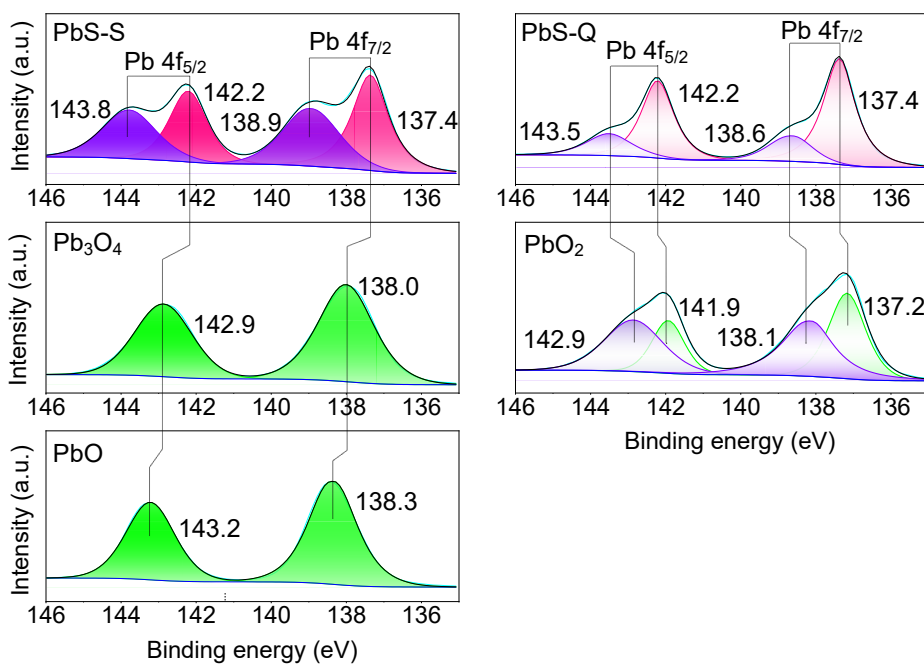

**Fig. S8** Fitting results of Pb 4f spectra of PbX<sub>n</sub>.

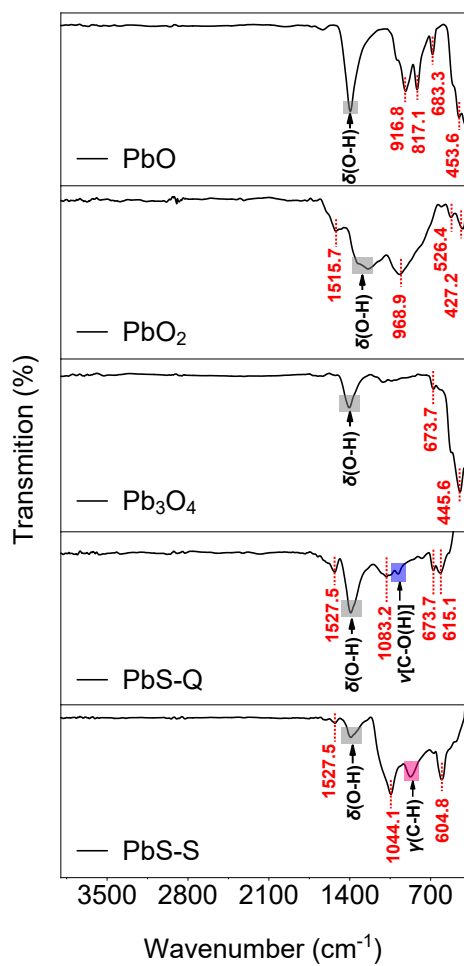

**Fig. S9** FT-IR spectra of PbX<sub>n</sub>.

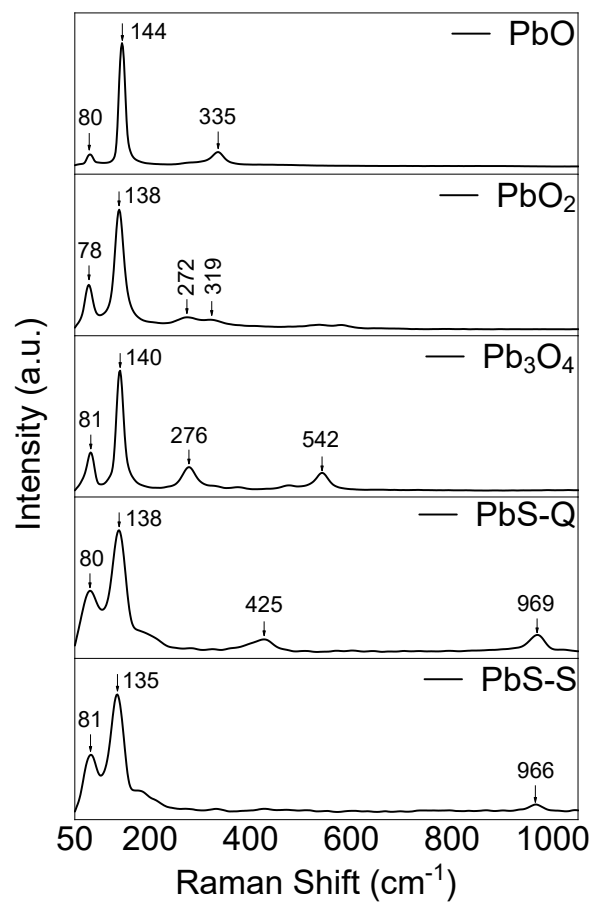

**Fig. S10** Raman spectra of  $\text{PbX}_n$ .

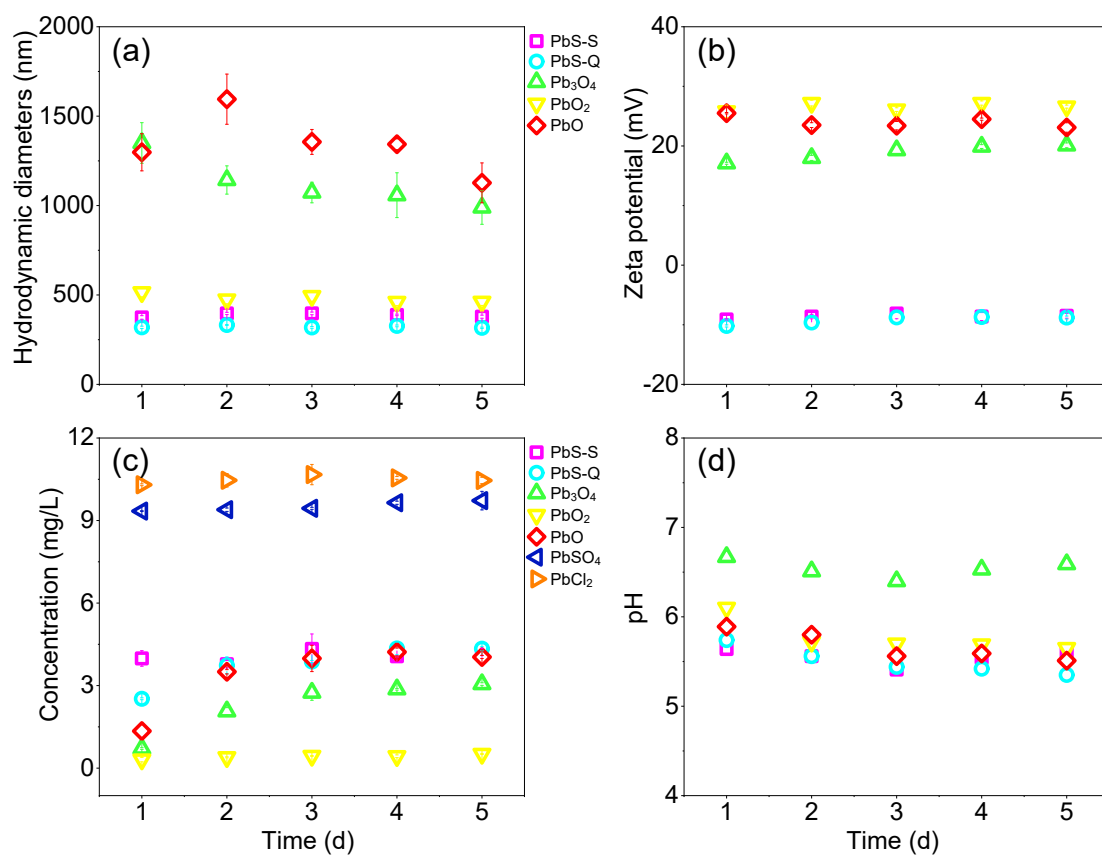

**Fig. S11** Characterization of 10 mg Pb L<sup>-1</sup> PbX<sub>n</sub> suspensions and salt solutions. (a) Hydrodynamic diameters; (b) Zeta potential values; (c) Concentrations of Pb ions; (d) pH.

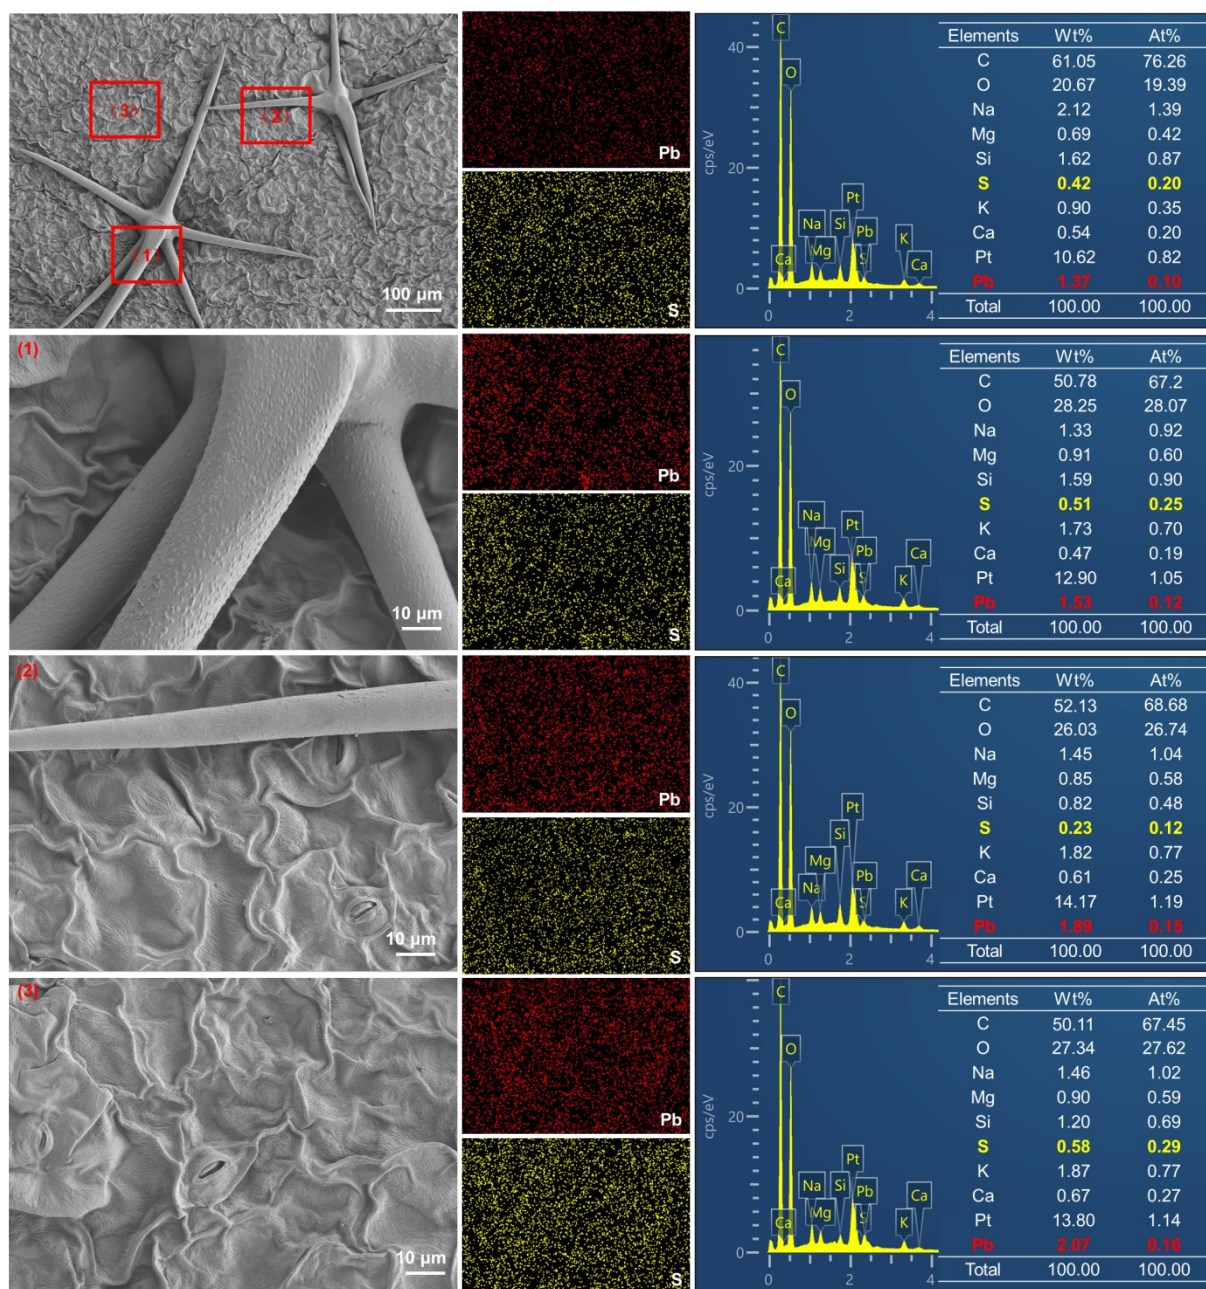

**Fig. S12** SEM images of no rinsed eggplant leaves and EDS mapping diagrams of Pb and S elements after exposure to PbS-S ( $M_{\text{Pb}} = 170 \mu\text{g}$ ) for 5 days. Wt%: weight percentage; At%: atomic percentage.



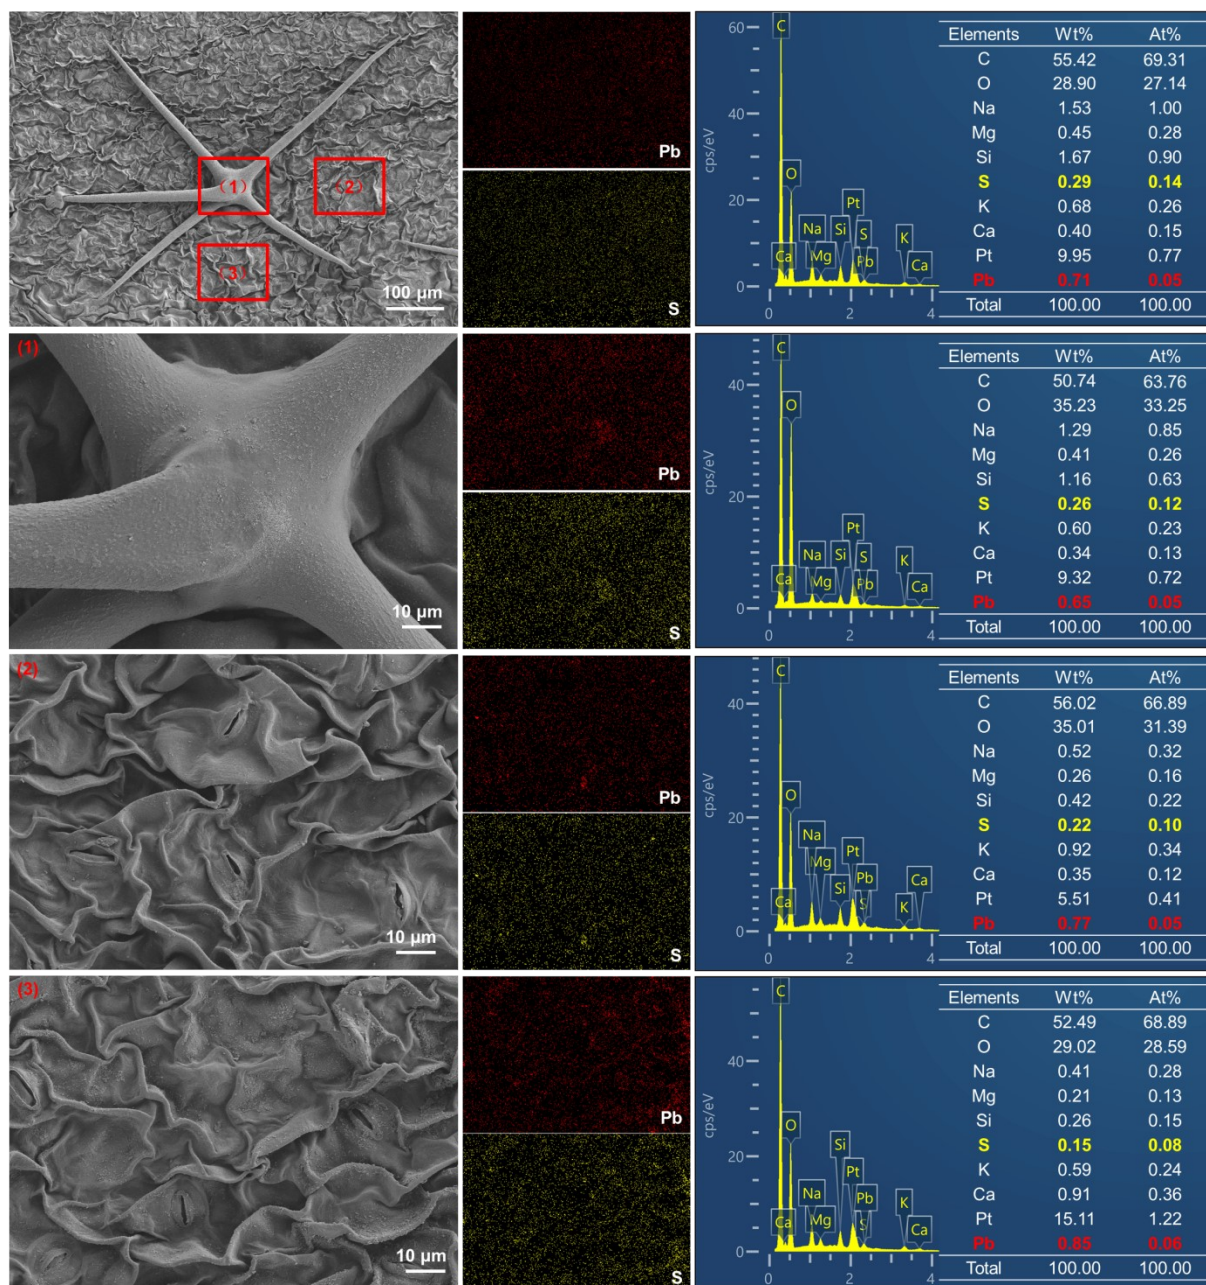

**Fig. S13** SEM images and EDS mapping diagrams of Pb and S elements of eggplant leaves rinsed with deionized water after exposure to PbS-S ( $M_{\text{Pb}} = 170 \mu\text{g}$ ) for 5 days. Wt%: weight percentage; At%: atomic percentage.

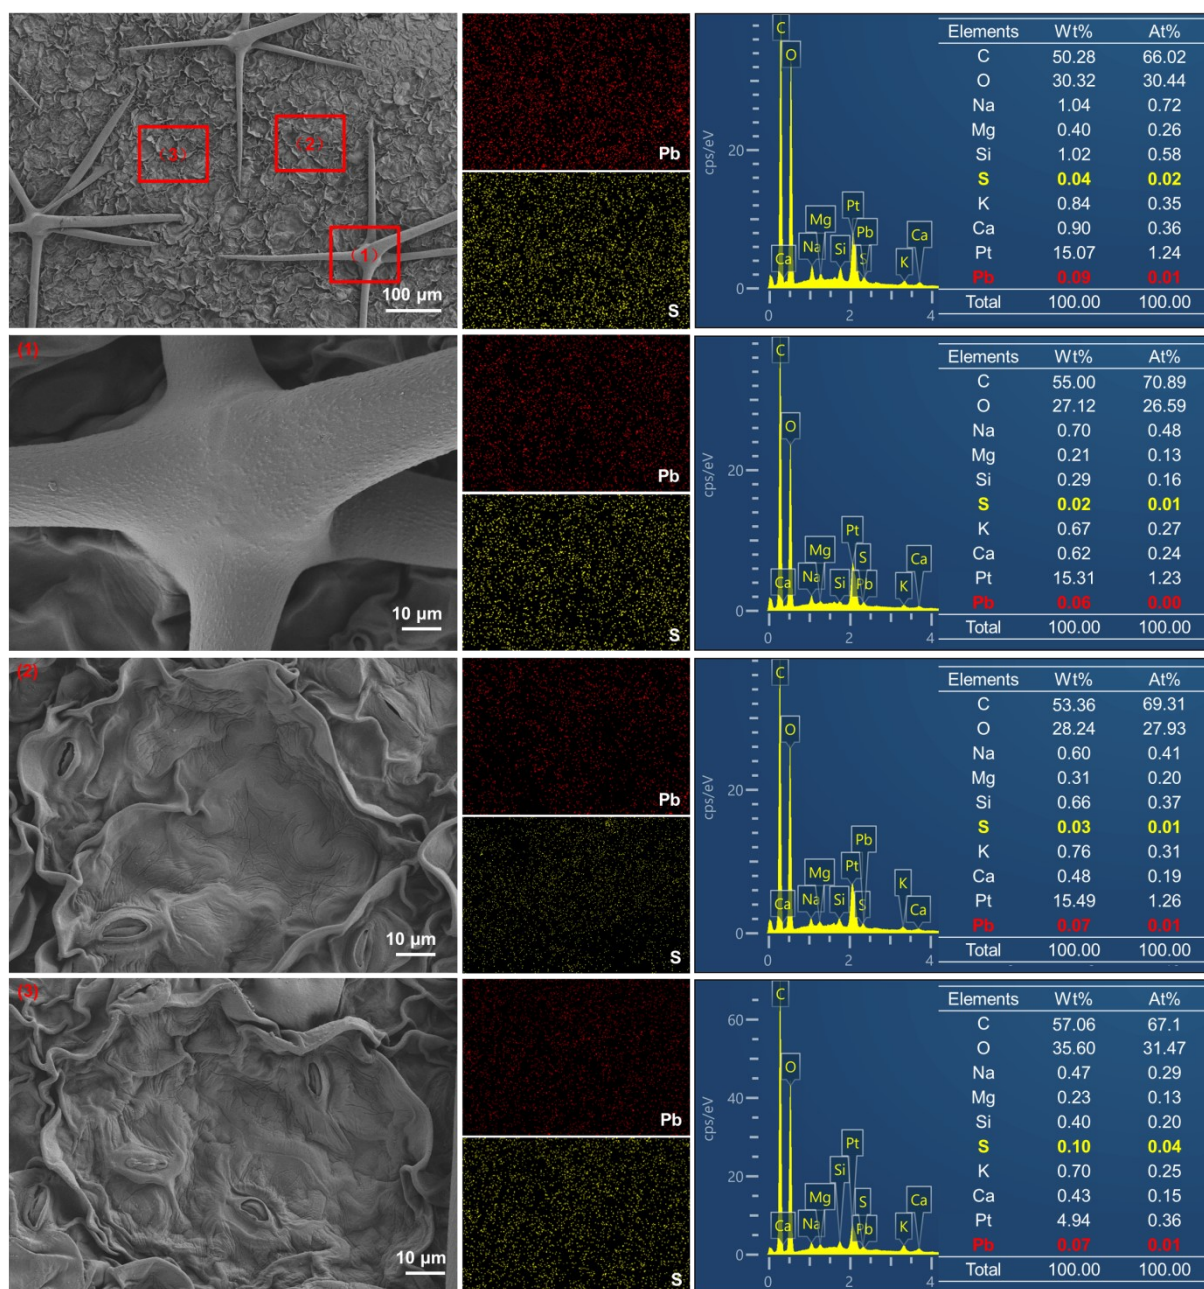

**Fig. S14** SEM images and EDS mapping diagrams of Pb and S elements of eggplant leaves rinsed with 20 mM EDTA-2Na solution after exposure to PbS-S ( $M_{\text{Pb}} = 170 \mu\text{g}$ ) for 5 days. Wt%: weight percentage; At%: atomic percentage.



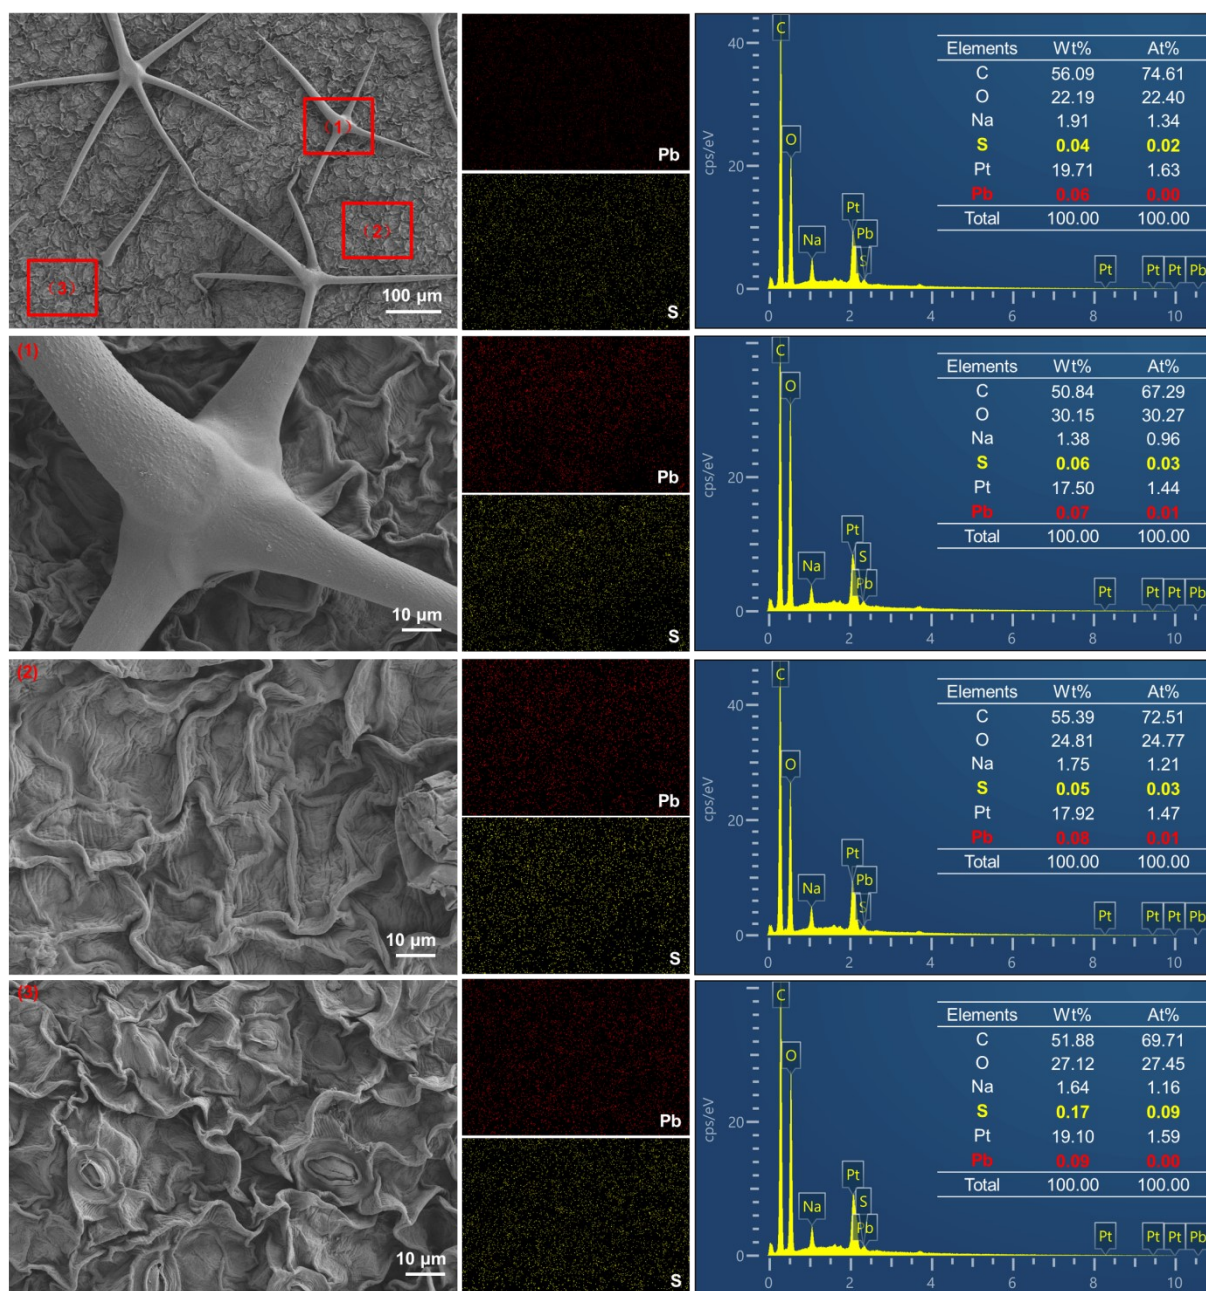

**Fig. S15** SEM images and EDS mapping diagrams of Pb and S elements of eggplant leaves rinsed with chloroform after exposure to PbS-S ( $M_{\text{pb}} = 170 \mu\text{g}$ ) for 5 days. Wt%: weight percentage; At%: atomic percentage.



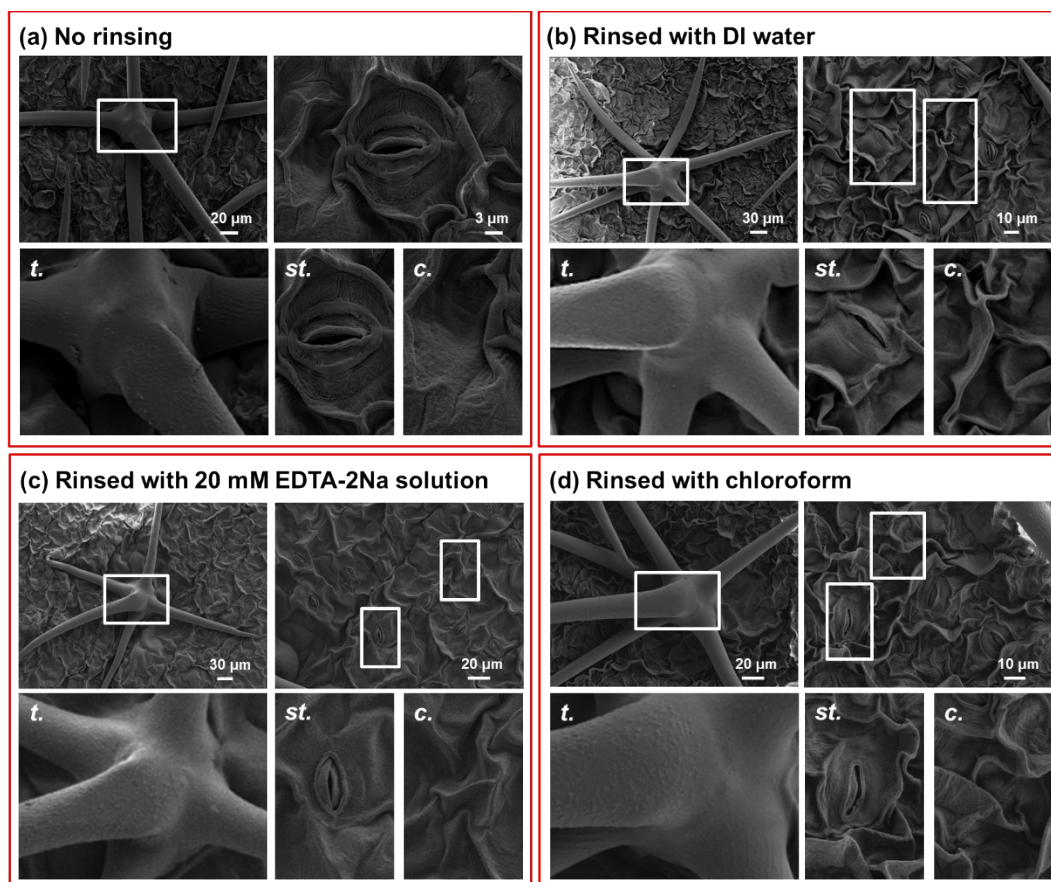

**Fig. S16** SEM-EDS images of eggplant leaves after exposure to deionized water for 5 days. (a) No rinsing; (b) Rinsed with deionized water; (c) Rinsed with 20 mM EDTA-2Na solution; (d) Rinsed with chloroform. Enlarged pictures of leaf structures in white boxes are shown in lower panels. *t.*: trichome; *st.*: stoma; *c.*: cuticle.

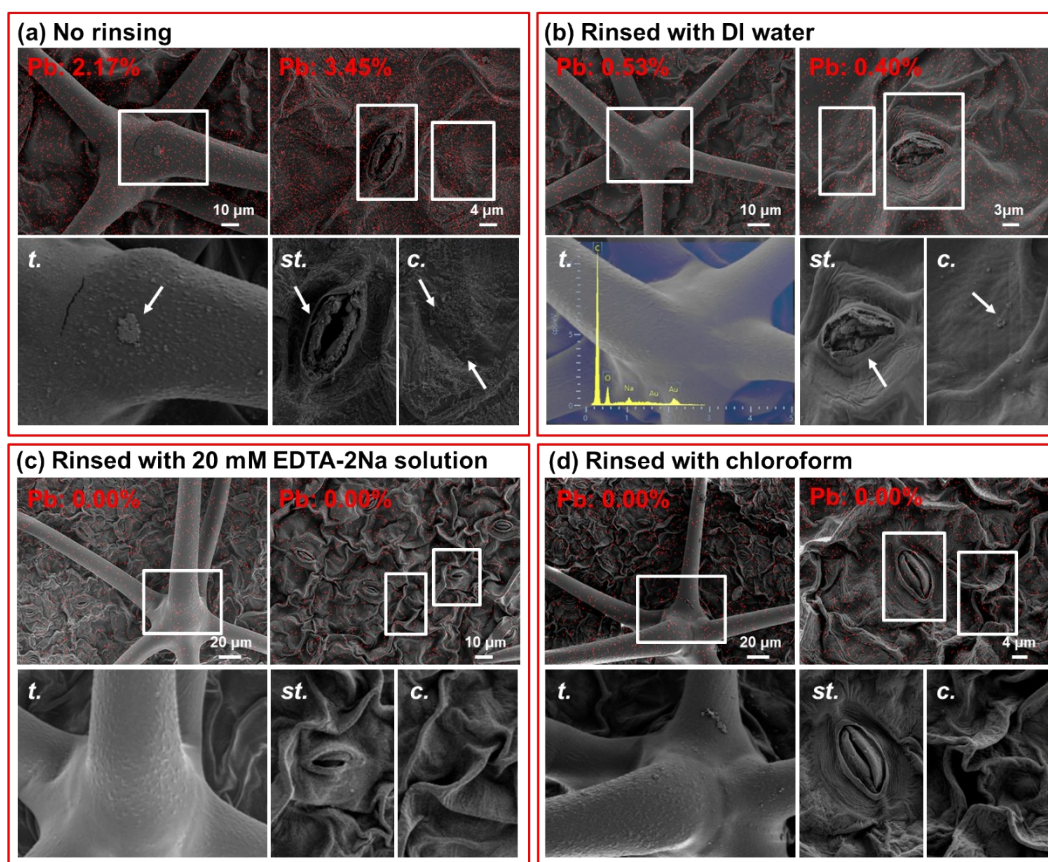

**Fig. S17** SEM-EDS images of eggplant leaves after exposure to PbS-Q ( $M_{\text{Pb}} = 170 \mu\text{g}$ ) for 5 days. (a) No rinsing; (b) Rinsed with deionized water; (c) Rinsed with 20 mM EDTA-2Na solution; (d) Rinsed with chloroform. Red dots represent element Pb. Red numbers in upper panels are percentage of element Pb by weight. White arrows indicate large aggregates of  $\text{PbX}_n$ . Enlarged pictures of leaf structures in white boxes are shown in lower panels. *t.*: trichome; *st.*: stoma; *c.*: cuticle.

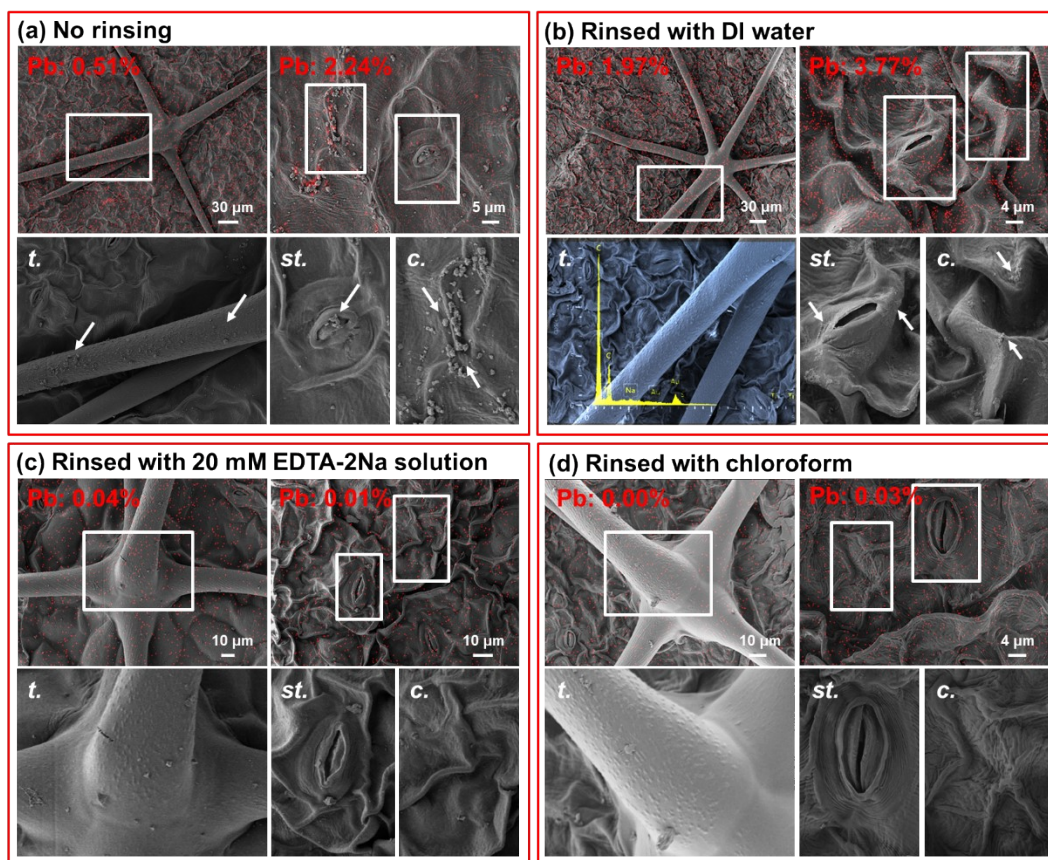

**Fig. S18** SEM-EDS images of eggplant leaves after exposure to  $\text{Pb}_3\text{O}_4$  ( $M_{\text{Pb}} = 170 \mu\text{g}$ ) for 5 days. (a) No rinsing; (b) Rinsed with deionized water; (c) Rinsed with 20 mM EDTA-2Na solution; (d) Rinsed with chloroform. Red dots represent element Pb. Red numbers in upper panels are percentage of element Pb by weight. White arrows indicate large aggregates of  $\text{PbX}_n$ . Enlarged pictures of leaf structures in white boxes are shown in lower panels. *t.*: trichome; *st.*: stoma; *c.*: cuticle.



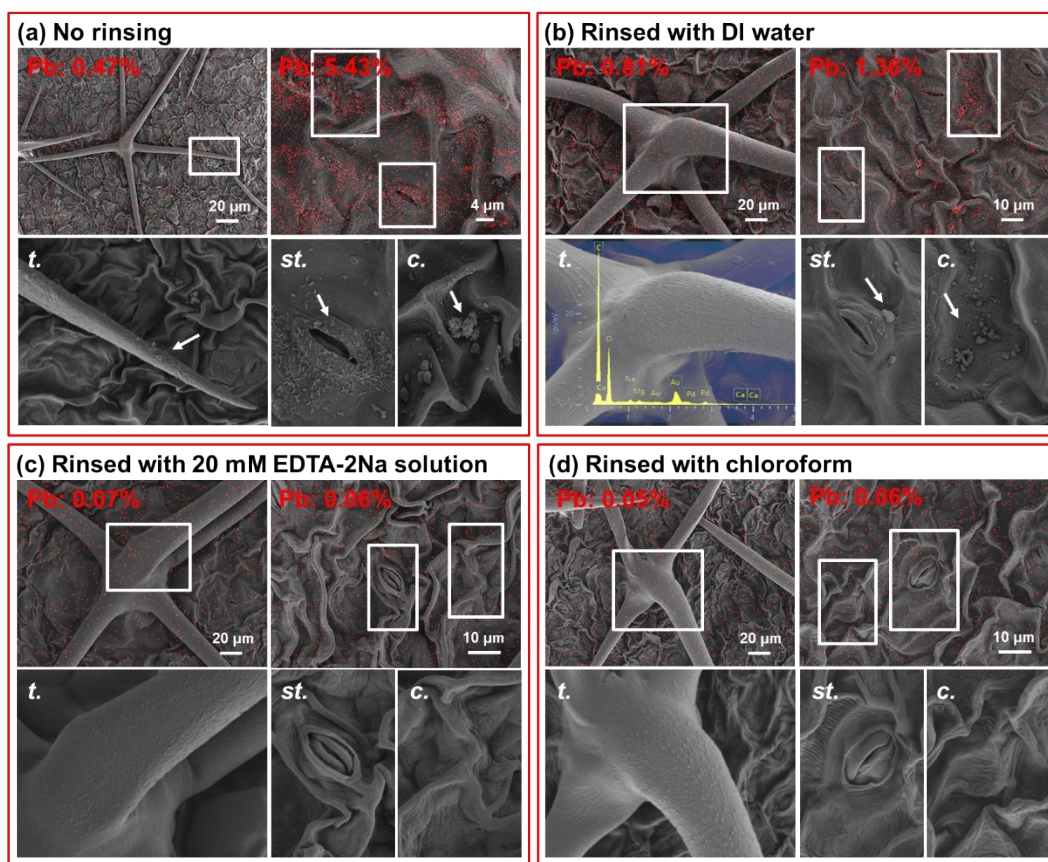

**Fig. S19** SEM-EDS images of eggplant leaves after exposure to  $\text{PbO}_2$  ( $M_{\text{Pb}} = 170 \mu\text{g}$ ) for 5 days. (a) No rinsing; (b) Rinsed with deionized water; (c) Rinsed with 20 mM EDTA-2Na solution; (d) Rinsed with chloroform. Red dots represent element Pb. Red numbers in upper panels are percentage of element Pb by weight. White arrows indicate large aggregates of  $\text{PbX}_n$ . Enlarged pictures of leaf structures in white boxes are shown in lower panels. *t.*: trichome; *st.*: stoma; *c.*: cuticle.

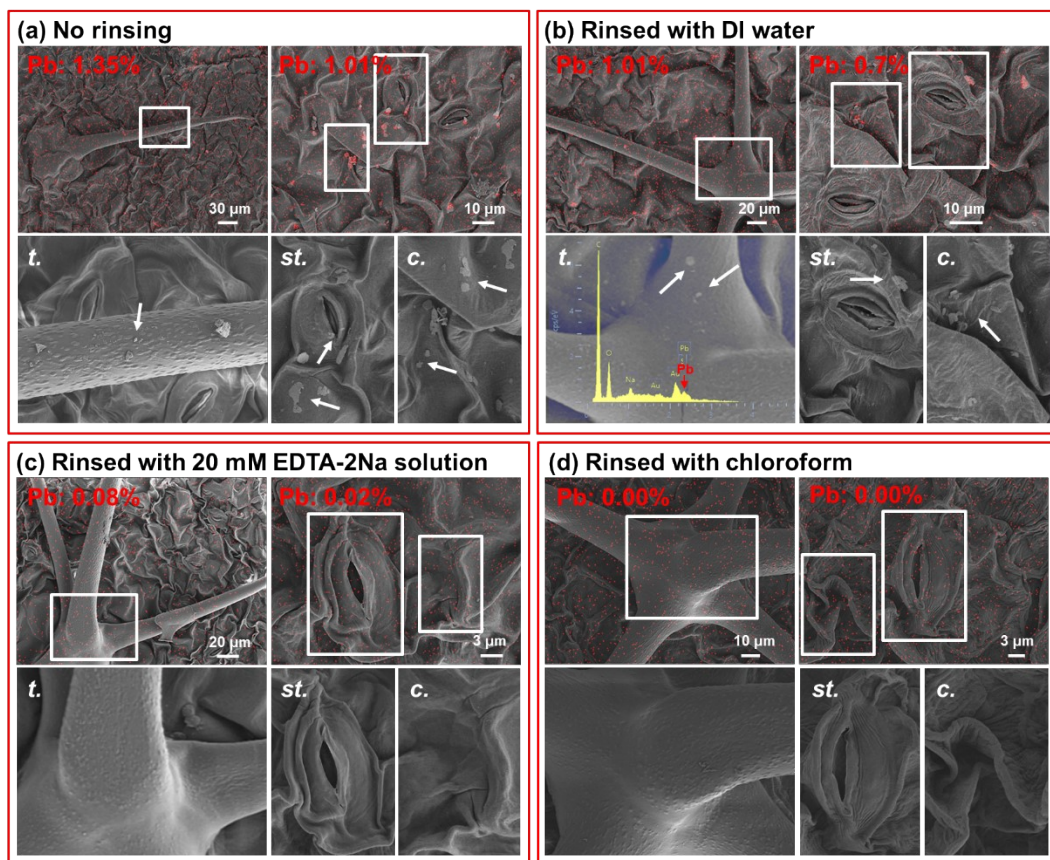

**Fig. S20** SEM-EDS images of eggplant leaves after exposure to PbO ( $M_{\text{Pb}} = 170 \mu\text{g}$ ) for 5 days. (a) No rinsing; (b) Rinsed with deionized water; (c) Rinsed with 20 mM EDTA-2Na solution; (d) Rinsed with chloroform. Red dots represent element Pb. Red numbers in upper panels are percentage of element Pb by weight. White arrows indicate large aggregates of PbX<sub>n</sub>. Enlarged pictures of leaf structures in white boxes are shown in lower panels. *t.*: trichome; *st.*: stoma; *c.*: cuticle.

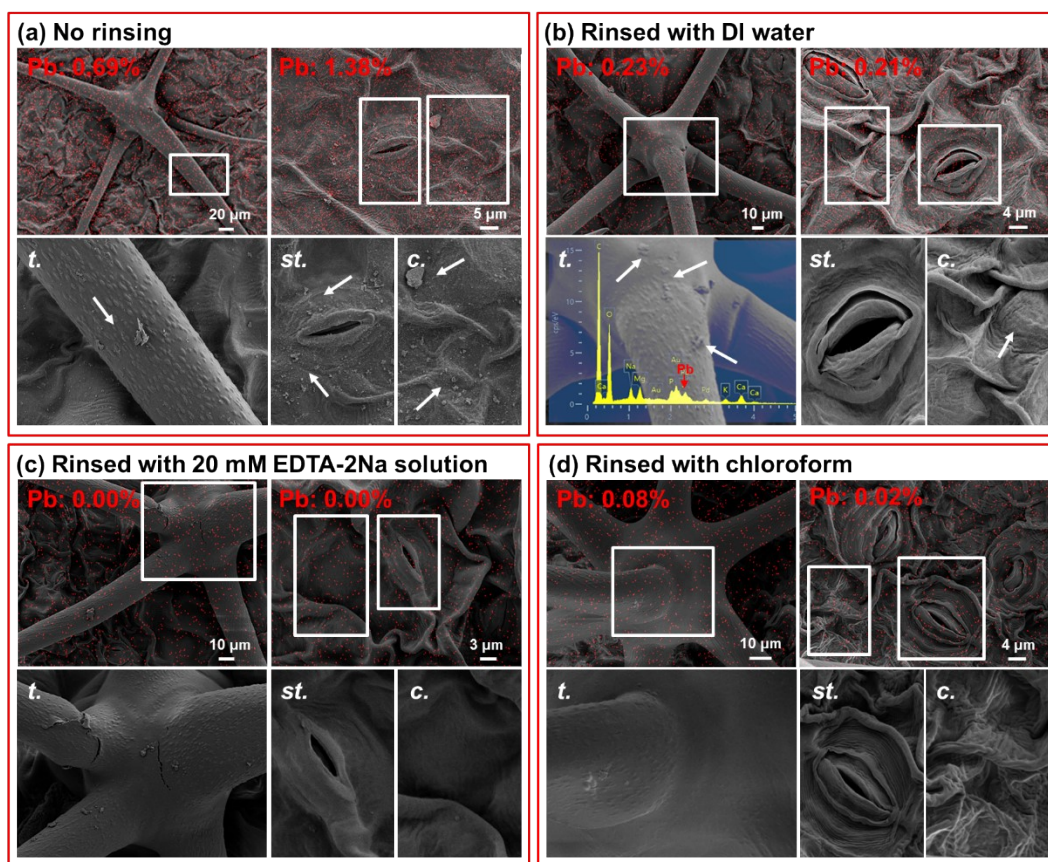

**Fig. S21** SEM-EDS images of eggplant leaves after exposure to  $\text{PbSO}_4$  ( $M_{\text{Pb}} = 170 \mu\text{g}$ ) for 5 days. (a) No rinsing; (b) Rinsed with deionized water; (c) Rinsed with 20 mM EDTA-2Na solution; (d) Rinsed with chloroform. Red dots represent element Pb. Red numbers in upper panels are percentage of element Pb by weight. White arrows indicate large aggregates of  $\text{PbX}_n$ . Enlarged pictures of leaf structures in white boxes are shown in lower panels. *t.*: trichome; *st.*: stoma; *c.*: cuticle.



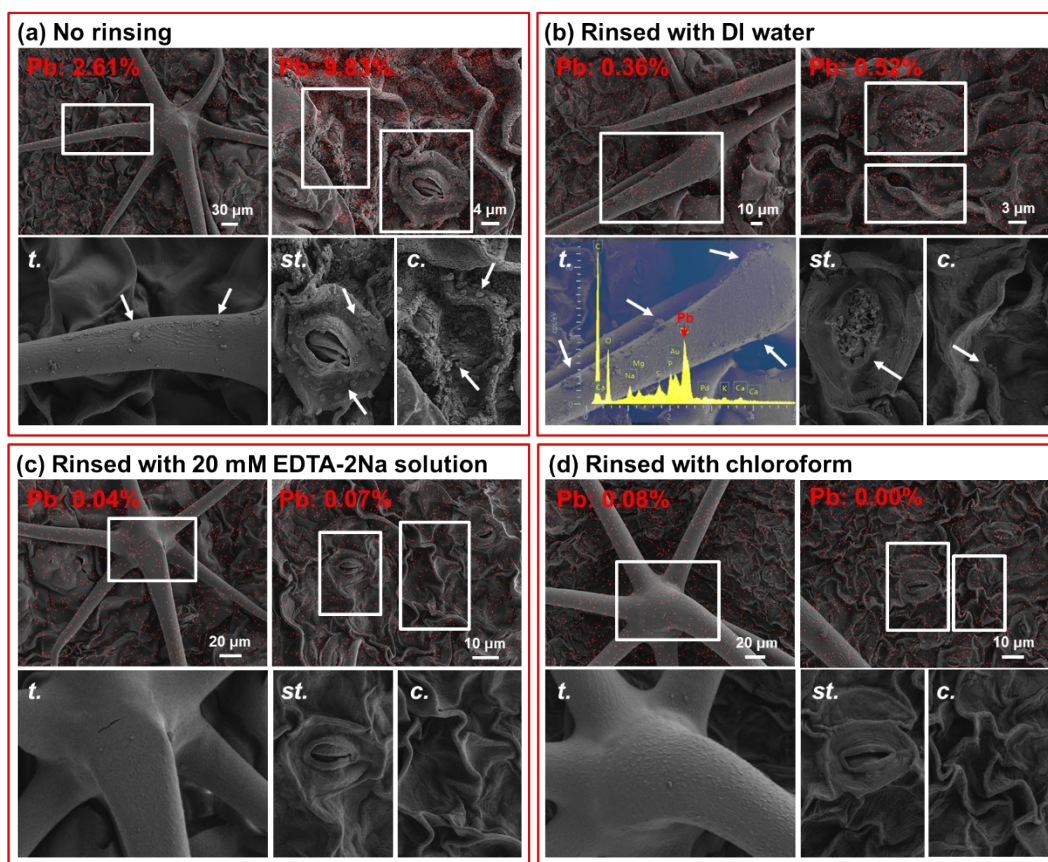

**Fig. S22** SEM-EDS images of eggplant leaves after exposure to  $\text{PbCl}_2$  ( $M_{\text{Pb}} = 170 \mu\text{g}$ ) for 5 days. (a) No rinsing; (b) Rinsed with deionized water; (c) Rinsed with 20 mM EDTA-2Na solution; (d) Rinsed with chloroform. Red dots represent element Pb. Red numbers in upper panels are percentage of element Pb by weight. White arrows indicate large aggregates of  $\text{PbX}_n$ . Enlarged pictures of leaf structures in white boxes are shown in lower panels. *t.*: trichome; *st.*: stoma; *c.*: cuticle.

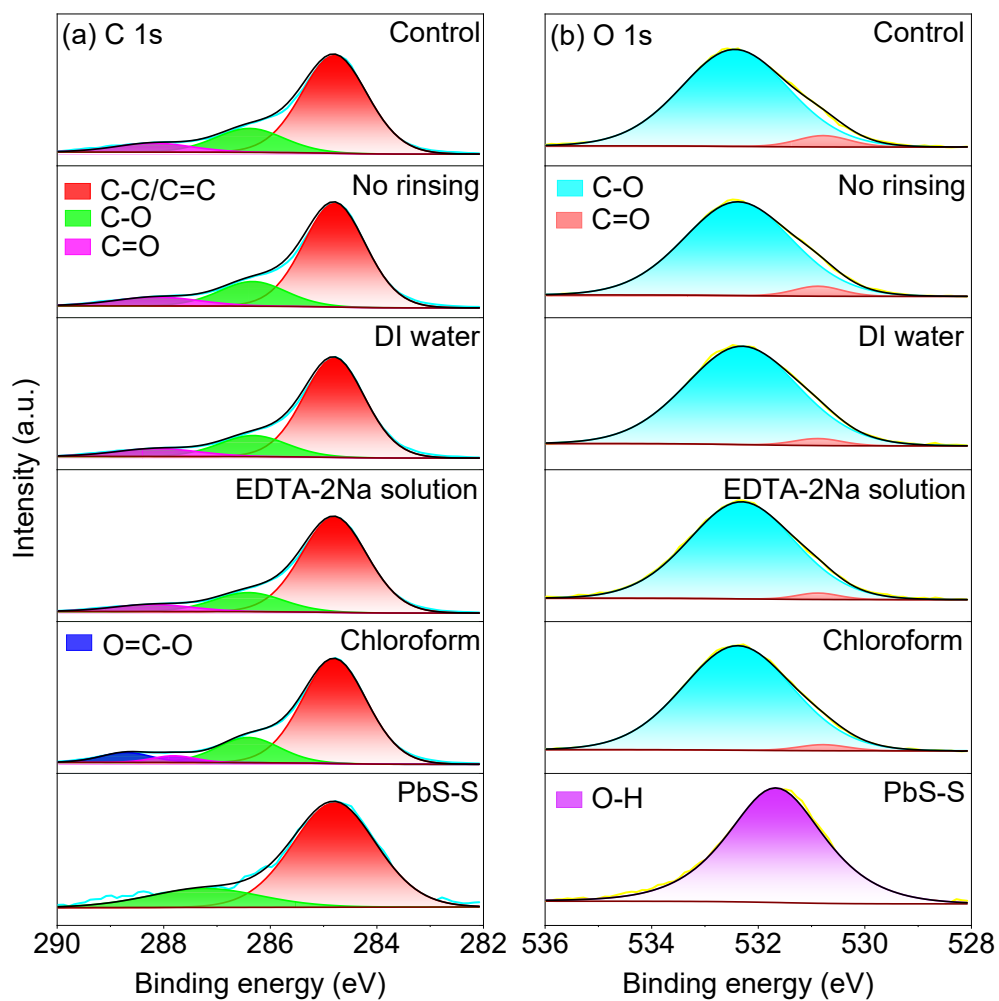

**Fig. S23** XPS spectra of different rinsing methods after PbS-S leaf exposure. (a) Fitting results of C 1s spectra; (b) Fitting results of O 1s spectra.



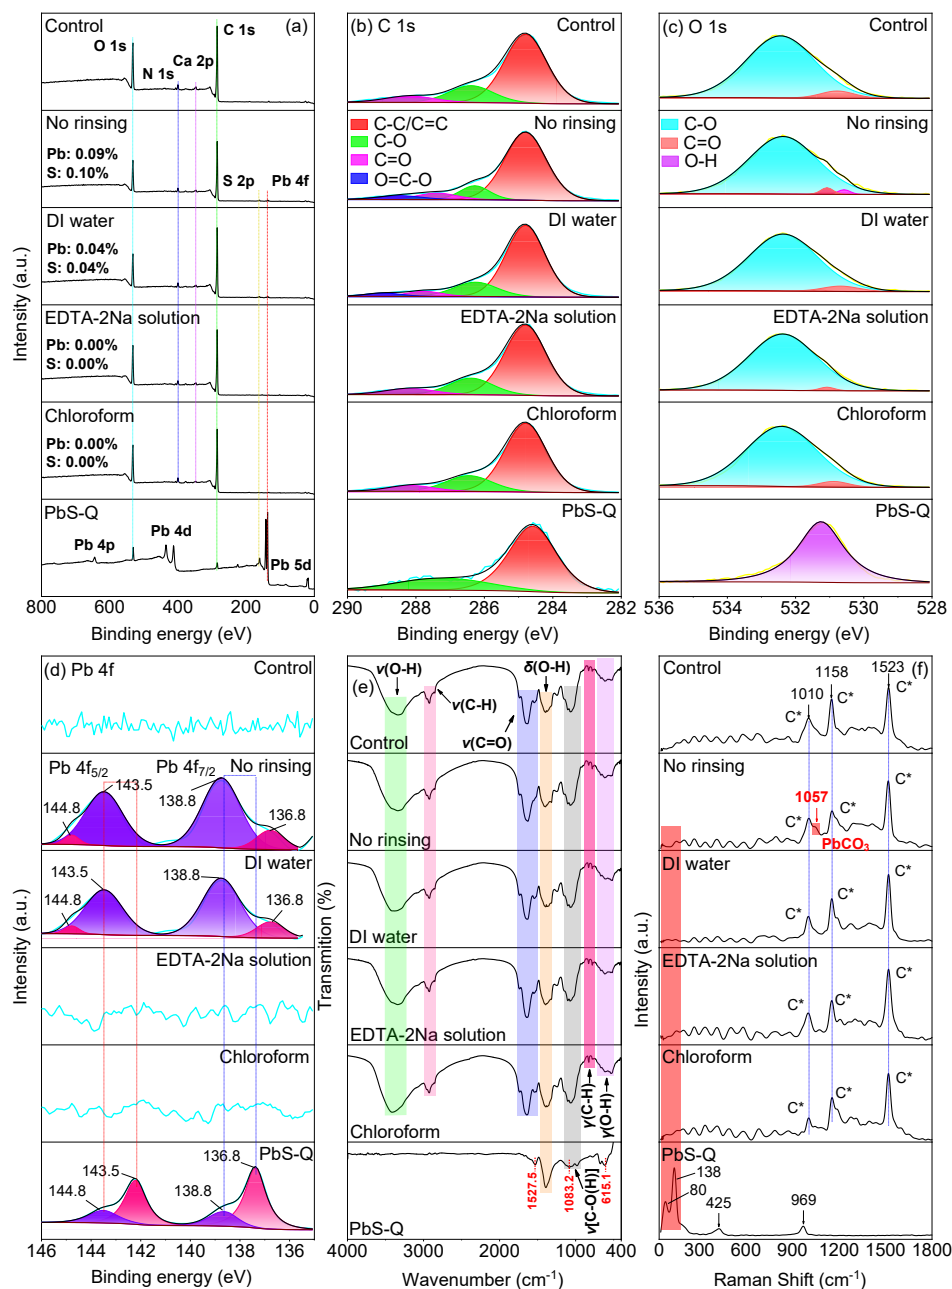

**Fig. S24** Characterization images of eggplant leaves after exposure to PbS-Q ( $M_{Pb} = 170 \mu g$ ) for 5 days. (a) XPS survey spectra; (b) Fitting results of C 1s spectra; (c) Fitting results of O 1s spectra; (d) Fitting results of Pb 4f spectra; (e) FT-IR spectra.  $\nu$ : stretching vibration bands.  $\delta$ : in-plane bending vibration bands.  $\gamma$ : out-of-plane bending vibration bands; (f) Raman spectra. C\* is related to Carbon species.

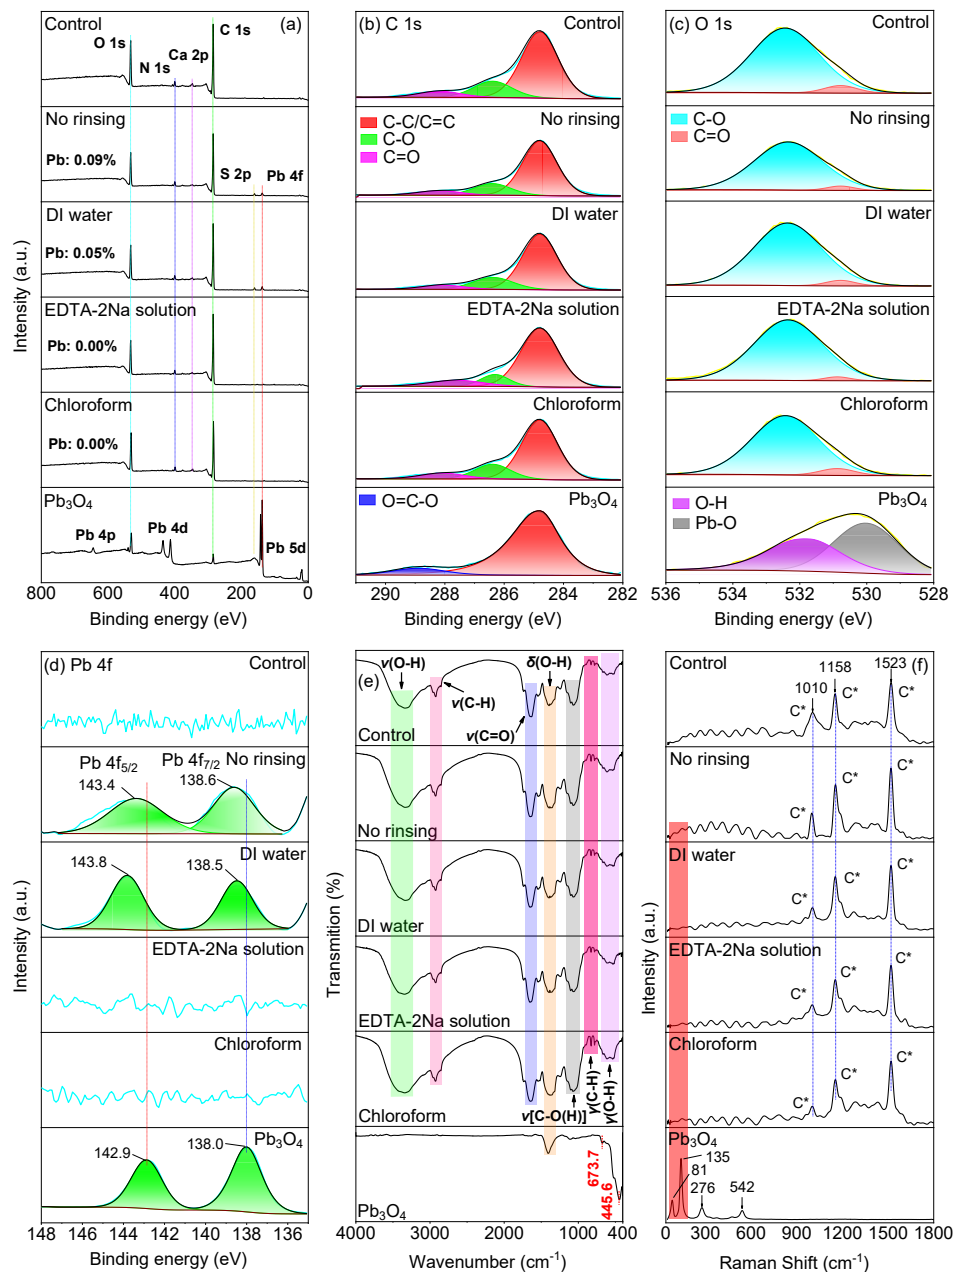

**Fig. S25** Characterization images of eggplant leaves after exposure to  $\text{Pb}_3\text{O}_4$  ( $M_{\text{Pb}} = 170 \mu\text{g}$ ) for 5 days. (a) XPS survey spectra; (b) Fitting results of C 1s spectra; (c) Fitting results of O 1s spectra; (d) Fitting results of Pb 4f spectra; (e) FT-IR spectra.  $\nu$ : stretching vibration bands.  $\delta$ : in-plane bending vibration bands.  $\gamma$ : out-of-plane bending vibration bands; (f) Raman spectra. C\* is related to Carbon species.

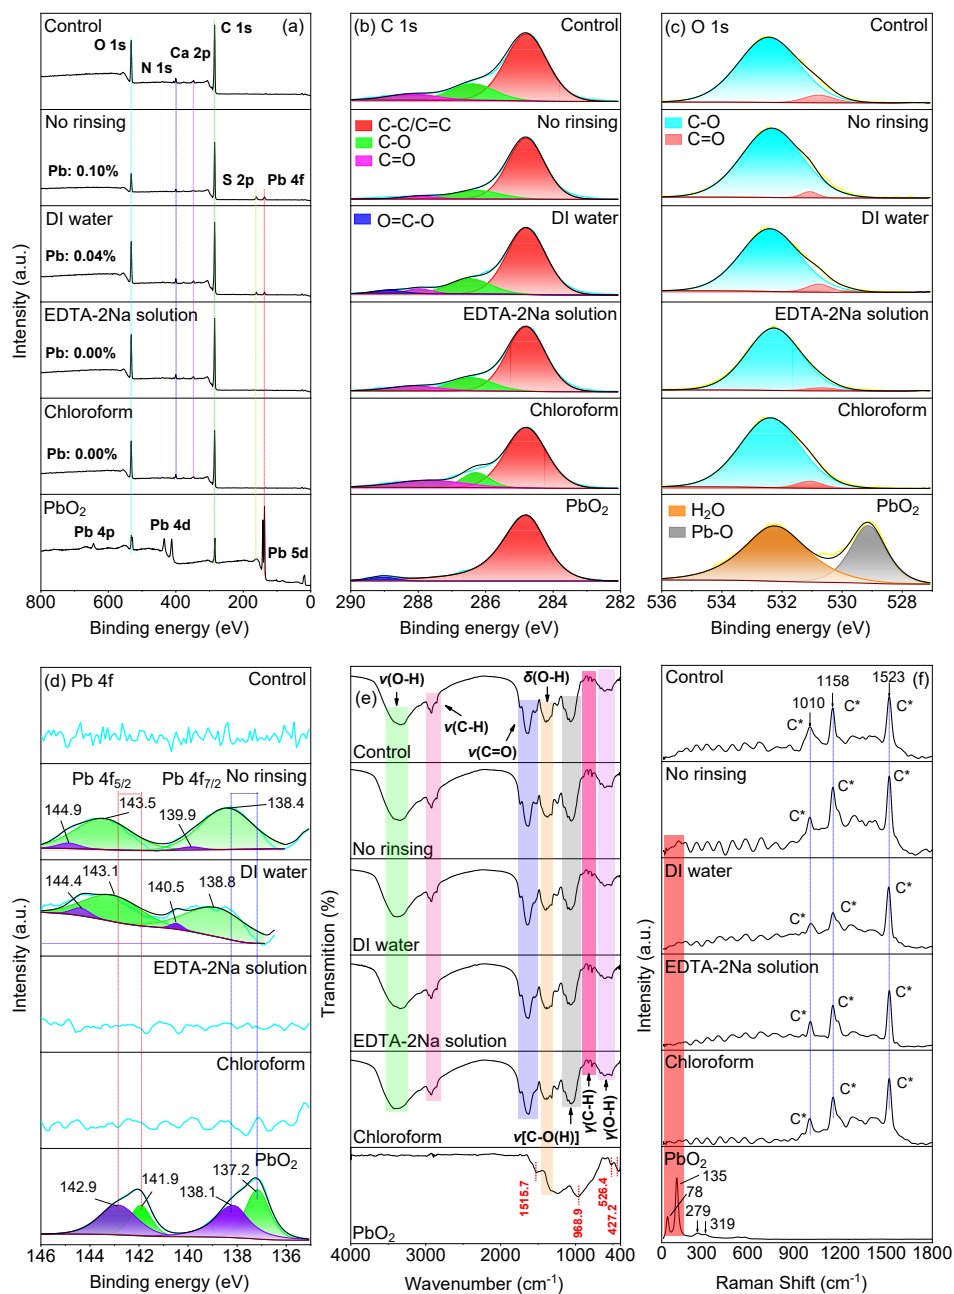

**Fig. S26** Characterization images of eggplant leaves after exposure to  $\text{PbO}_2$  ( $M_{\text{Pb}} = 170 \mu\text{g}$ ) for 5 days. (a) XPS survey spectra; (b) Fitting results of C 1s spectra; (c) Fitting results of O 1s spectra; (d) Fitting results of Pb 4f spectra; (e) FT-IR spectra.  $\nu$ : stretching vibration bands.  $\delta$ : in-plane bending vibration bands.  $\gamma$ : out-of-plane bending vibration bands; (f) Raman spectra. C\* is related to Carbon species.

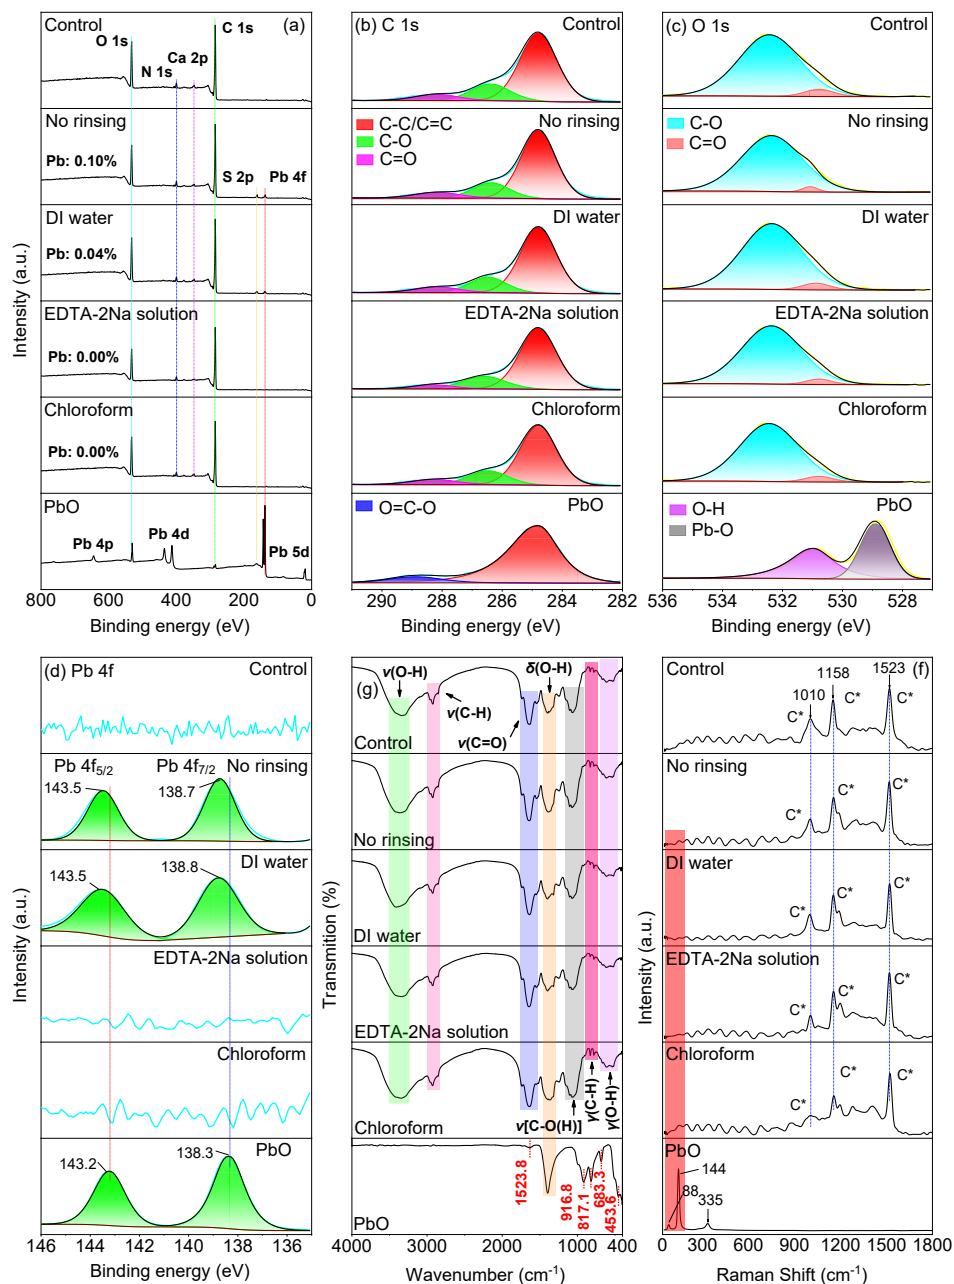

**Fig. S27** Characterization images of eggplant leaves after exposure to PbO ( $M_{Pb} = 170 \mu g$ ) for 5 days. (a) XPS survey spectra; (b) Fitting results of C 1s spectra; (c) Fitting results of O 1s spectra; (d) Fitting results of Pb 4f spectra; (e) FT-IR spectra.  $\nu$ : stretching vibration bands.  $\delta$ : in-plane bending vibration bands.  $\gamma$ : out-of-plane bending vibration bands; (f) Raman spectra. C\* is related to Carbon species.

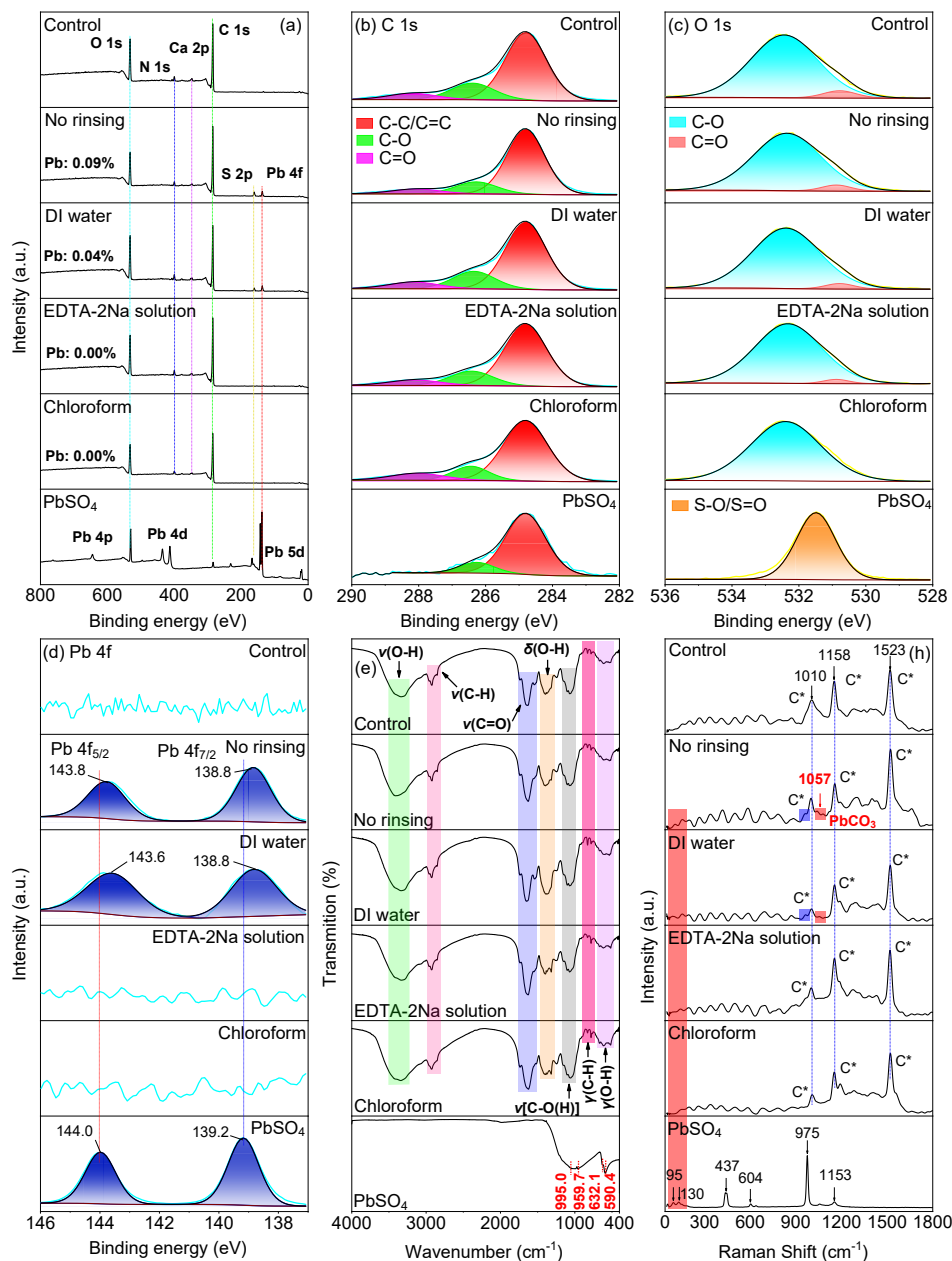

**Fig. S28** Characterization images of eggplant leaves after exposure to  $\text{PbSO}_4$  ( $M_{\text{Pb}} = 170 \mu\text{g}$ ) for 5 days. (a) XPS survey spectra; (b) Fitting results of C 1s spectra; (c) Fitting results of O 1s spectra; (d) Fitting results of Pb 4f spectra; (e) FT-IR spectra.  $\nu$ : stretching vibration bands.  $\delta$ : in-plane bending vibration bands.  $\gamma$ : out-of-plane bending vibration bands; (f) Raman spectra. C\* is related to Carbon species.

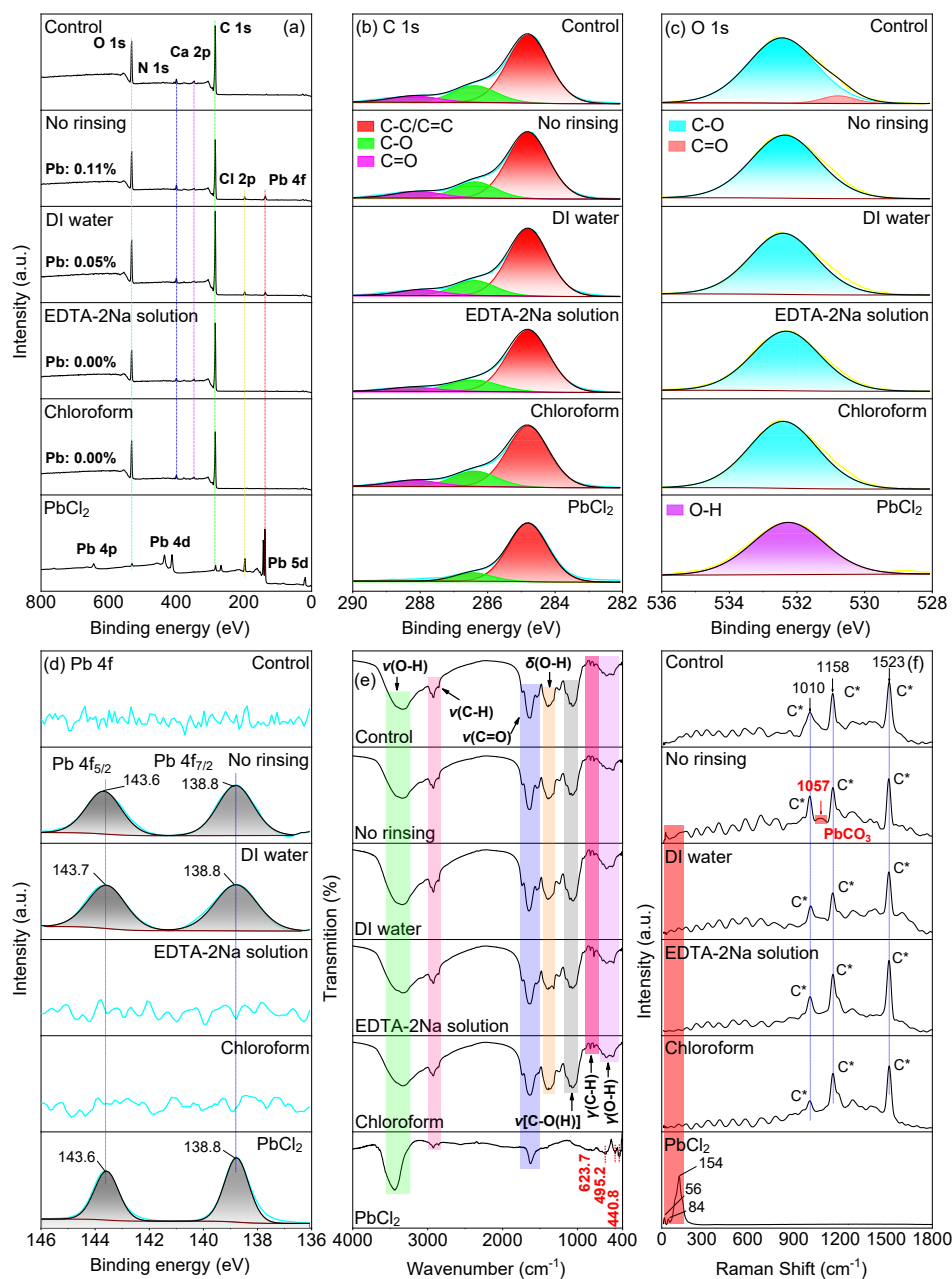

**Fig. S29** Characterization images of eggplant leaves after exposure to  $\text{PbCl}_2$  ( $M_{\text{Pb}} = 170 \mu\text{g}$ ) for 5 days. (a) XPS survey spectra; (b) Fitting results of C 1s spectra; (c) Fitting results of O 1s spectra; (d) Fitting results of Pb 4f spectra; (e) FT-IR spectra.  $\nu$ : stretching vibration bands.  $\delta$ : in-plane bending vibration bands.  $\gamma$ : out-of-plane bending vibration bands; (f) Raman spectra. C\* is related to Carbon species.



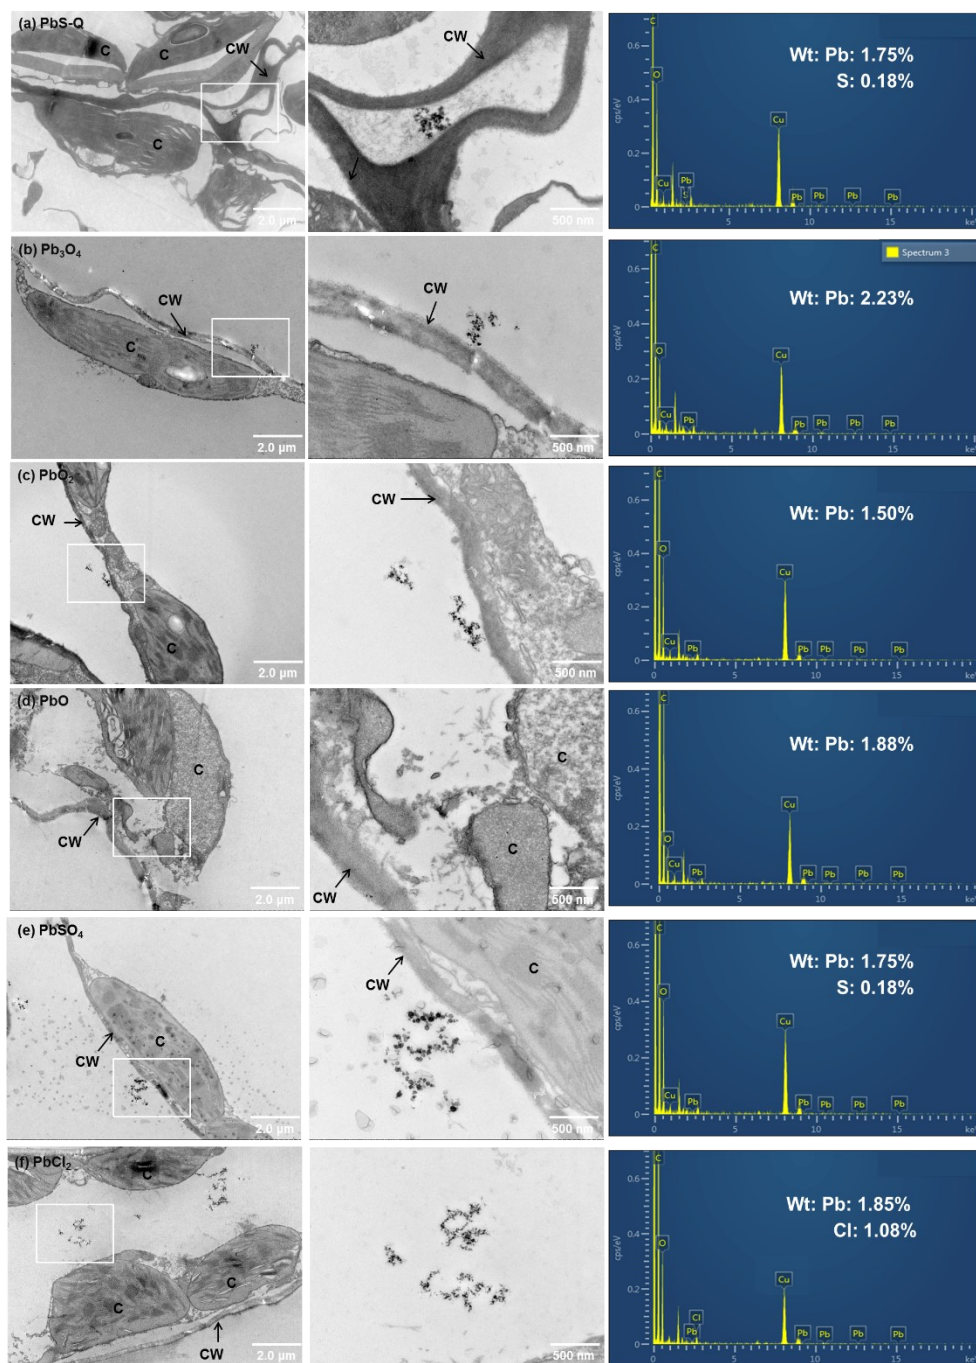

**Fig. S30** Transmission electron microscopy energy-dispersive spectroscopy (TEM-EDS) analysis of Pb-rich regions on eggplant leaves exposed to  $\text{PbX}_n$  for 5 days. Wt: weight percentage. CW: cell wall; C: chloroplast.

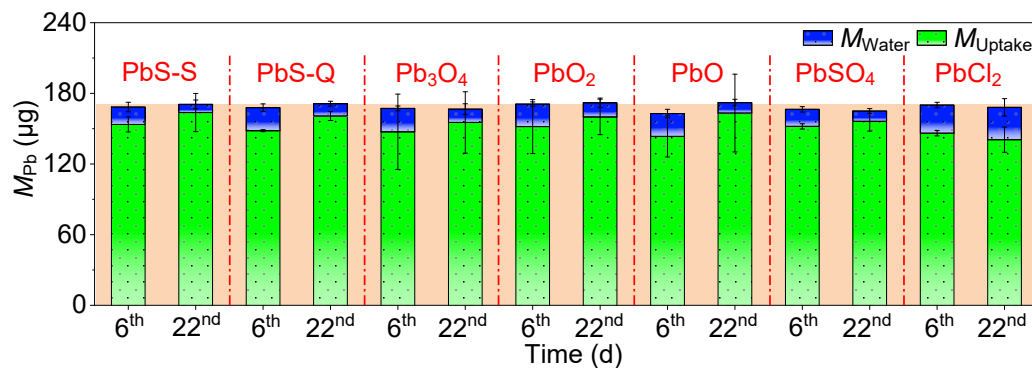

**Fig. S31** Mass of lead ( $M_{Pb}$ ) in eggplant leaves ( $M_{Uptake}$ ) or deionized water ( $M_{Water}$ ). Total amount of Pb applied to leaves at each experiment period is indicate by the pink background. Data are mean  $\pm$  SD (n = 5).

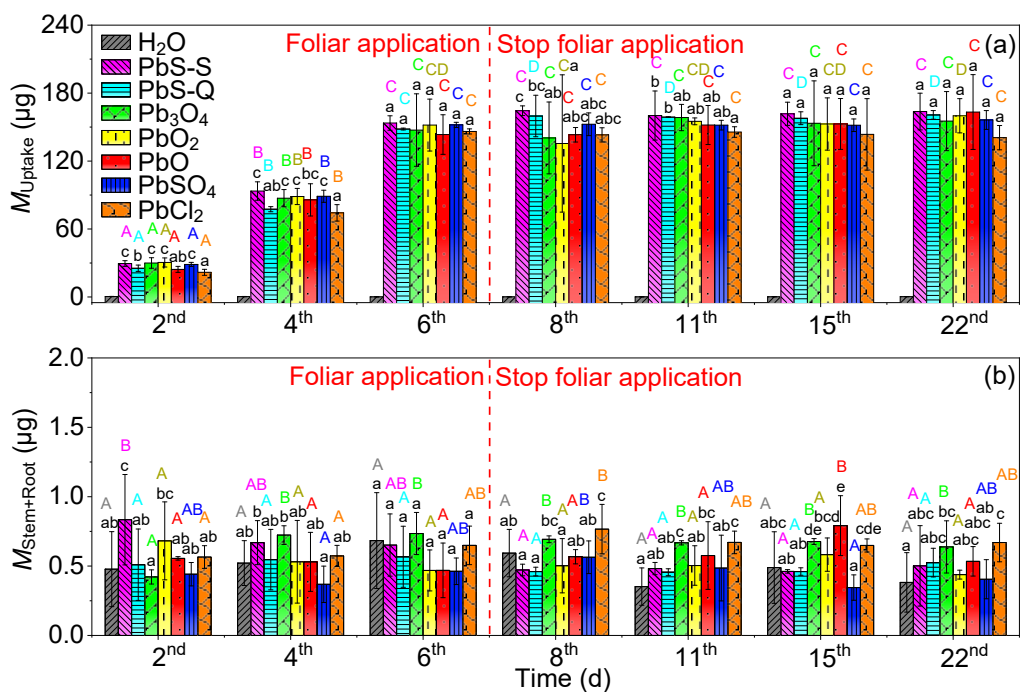

**Fig. S32** Significant testing of mass or concentration of Pb in different organs of eggplant. (a) Total amount of Pb in leaves after rinsing with deionized water,  $M_{Adhesion}$ . The capital letters on



top of columns indicate significant differences between different exposure days for each Pb species ( $p < 0.05$ ). The lowercase letters on top of columns indicate significant differences between different Pb species on the same day ( $p < 0.05$ ); (b) Mass of Pb in stems and roots ( $M_{\text{Stem+Root}}$ ). The capital letters on top of columns indicate significant differences between different exposure days for each Pb species ( $p < 0.05$ ). The lowercase letters on top of columns indicate significant differences between different Pb species on the same day ( $p < 0.05$ ). Data are mean  $\pm$  SD ( $n = 5$ ).

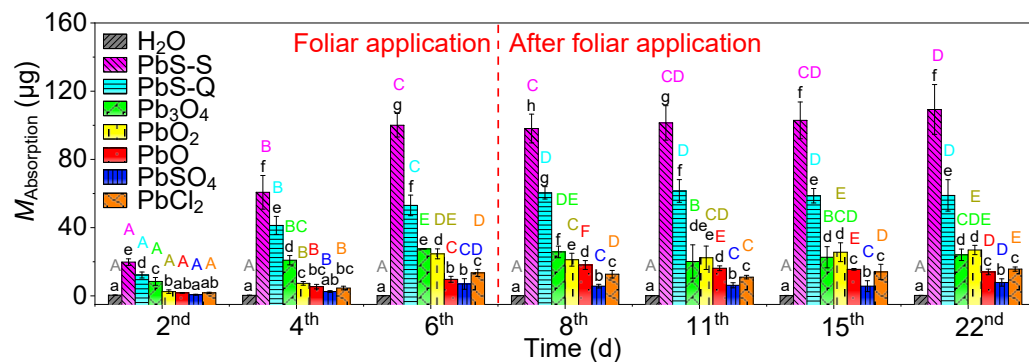

**Fig. S33** Significant testing of uptake mass of Pb in leaves after rinsing with 20 mM EDTA-2Na solution. The capital letters on top of columns indicate significant differences between different exposure days for each Pb species ( $p < 0.05$ ). The lowercase letters on top of columns indicate significant differences between different Pb species on the same day ( $p < 0.05$ ). Data are mean  $\pm$  SD ( $n = 5$ ).

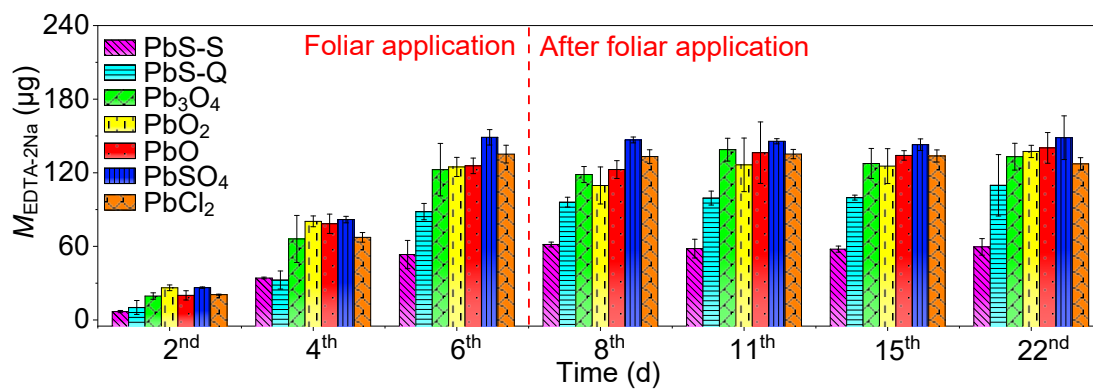

**Fig. S34** Mass of Pb in 20 mM EDTA-2Na solution,  $M_{\text{EDTA-2Na}}$ . Data are mean  $\pm$  SD (n = 5).

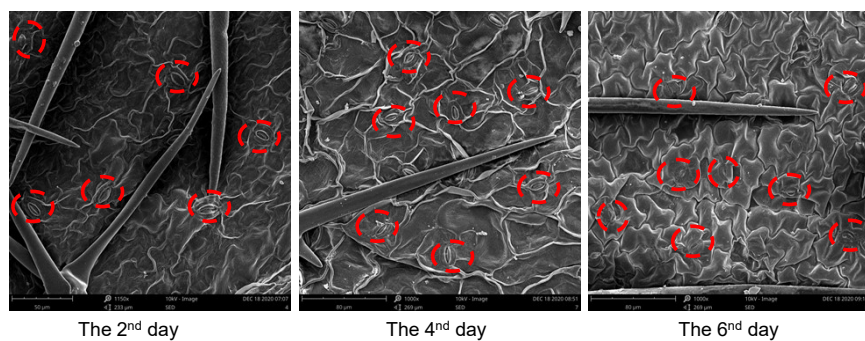

**Fig. S35** Closed stomata of eggplant leaves surface on the 2<sup>nd</sup>, 4<sup>th</sup> and 6<sup>th</sup> days after 1 mM abscisic acid (ABA) treatment.

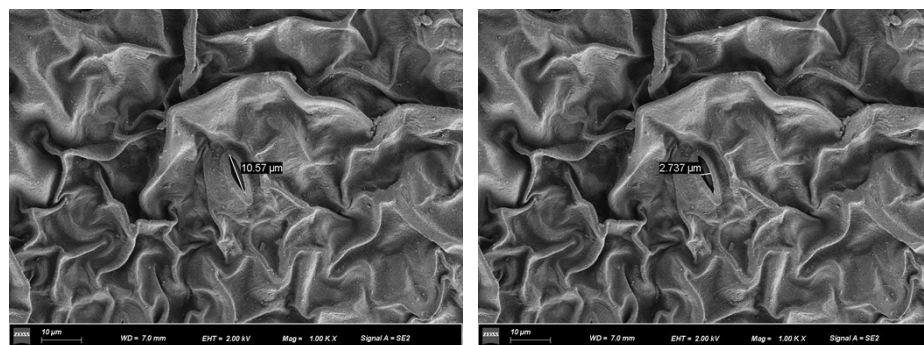

**Fig. S36** Sizes of stomata on eggplant leaves.

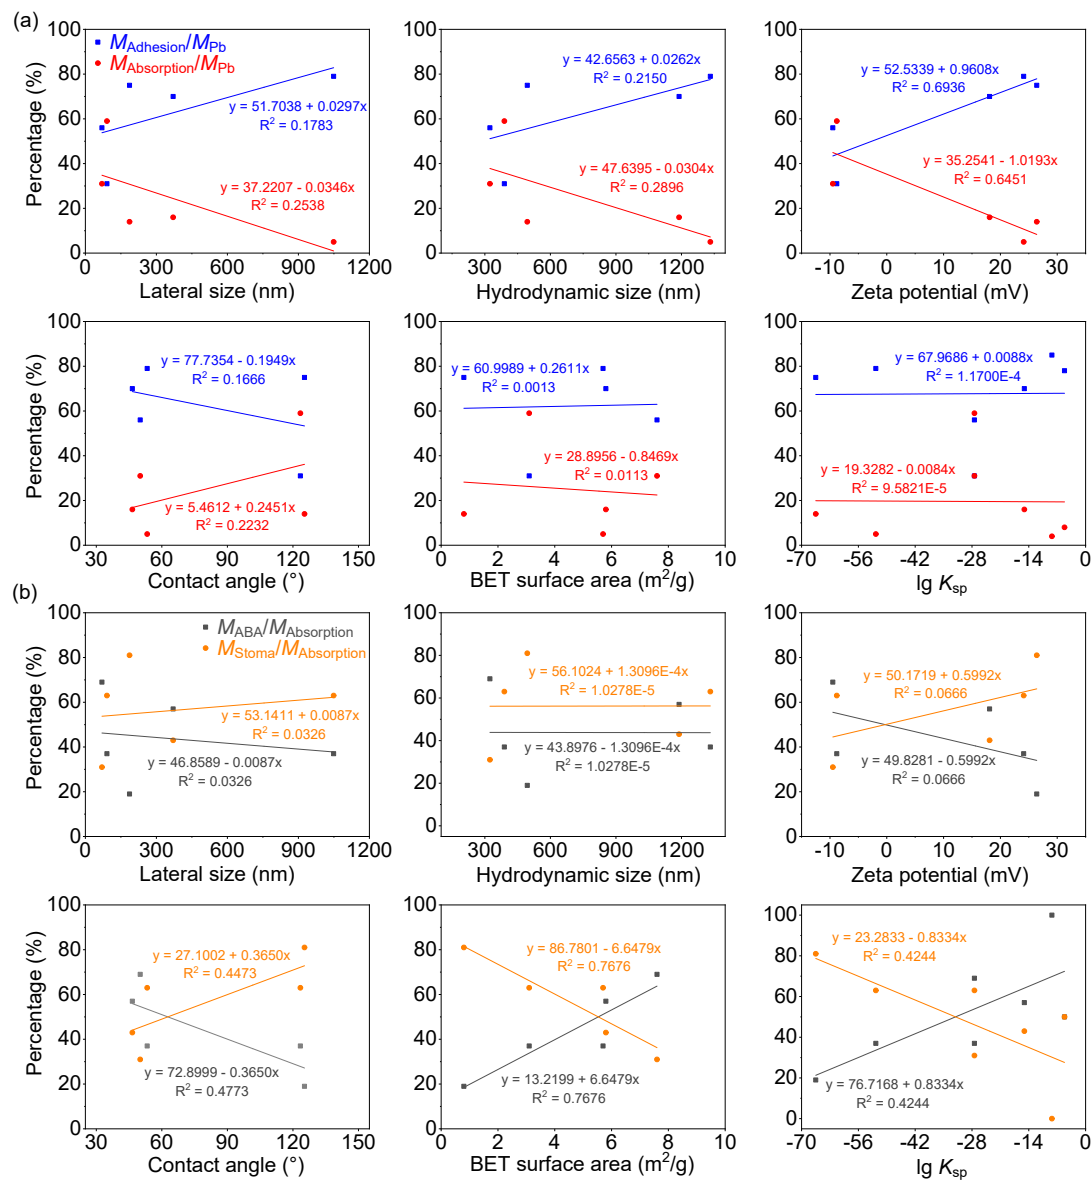

**Fig. S37** Variations of (a) adhesion/absorption rates ( $M_{Adhesion}/M_{Pb}$  or  $M_{Absorption}/M_{Pb}$ ) ( $M_{Pb} = 170 \mu g$ ) or (b) wax/stomatal absorption rates ( $M_{ABA}/M_{Absorption}$  or  $M_{Stoma}/M_{Absorption}$ ) of Pb species with single surface property.

## References

1. G. J. Zhou, M. K. Lü, Z. L. Xiu, S. F. Wang, H. P. Zhang, Y. Y. Zhou and S. M. Wang, Controlled synthesis of high-quality PbS star-shaped dendrites, multipods, truncated nanocubes, and nanocubes and their shape evolution process, *J. Phys. Chem. B*, 2006, **110**, 6543-6548.
2. Q. L. Yu, M. Q. Sun, Y. Wang, M. C. Li and L. Liu, The interaction between lead sulfide nano-dendrites and *Saccharomyce cerevisiae* is involved in nanotoxicity, *RSC Adv.*, 2014, **4**, 20371-20378.
3. K. Park, S. Park, J. Choi, G. Kim, M. Tong and H. Kim, Influence of excess sulfide ions on the malachite-bubble interaction in the presence of thiol-collector, *Sep. Purif. Technol.*, 2016, **168**, 1-7.
4. Y. L. Zhao, S. C. Kang, L. Qin, W. N. Wang, T. T. Zhang, S. X. Song and S. Komarneni, Self-assembled gels of Fe-chitosan/montmorillonite nanosheets: Dye degradation by the synergistic effect of adsorption and photo-Fenton reaction, *Chem. Eng. J.*, 2020, **379**.
5. W. J. Peng, G. H. Han, Y. J. Cao, K. G. Sun and S. X. Song, Efficiently removing Pb(II) from wastewater by graphene oxide using foam flotation, *Colloid. Surface. A*, 2018, **556**, 266-272.
6. I. V. Filippova, L. O. Filippov, Z. Lafhaj, O. Barres and D. Fornasiero, Effect of calcium minerals reactivity on fatty acids adsorption and flotation, *Colloid. Surface. A*, 2018, **545**, 157-166.
7. Q. C. Feng, S. M. Wen, W. J. Zhao, J. S. Deng and Y. J. Xian, Adsorption of sulfide ions on cerussite surfaces and implications for flotation, *Appl. Surf. Sci.*, 2016, **360**, 365-372.
8. L. Y. Dong, F. Jiao, W. Q. Qin, H. L. Zhu and W. H. Jia, Activation effect of lead ions on scheelite flotation: Adsorption mechanism, AFM imaging and adsorption model, *Sep. Purif. Technol.*, 2019, **209**, 955-963.
9. A. V. Shchukarev and D. V. Korolkov, XPS study of group IA carbonates, *Cent. Eur. J. Chem.*, 2004, **2**, 347-362.
10. S. Rondon and P. M. A. Sherwood, Core Level and Valence Band Spectra of PbO by XPS, *Surf. Sci. Spectra*, 1998, **5**, 97-103.
11. R. T. Guo, C. Z. Lu, W. G. Pan, W. L. Zhen, Q. S. Wang, Q. L. Chen, H. L. Ding and N. Z. Yang, A comparative study of the poisoning effect of Zn and Pb on Ce/TiO<sub>2</sub> catalyst for low temperature selective catalytic reduction of NO with NH<sub>3</sub>, *Catal. Commun.*, 2015, **59**, 136-139.
12. Z. H. Lian, F. D. Liu, H. He, X. Y. Shi, J. S. Mo and Z. B. Wu, Manganese–niobium mixed oxide catalyst for the selective catalytic reduction of NO<sub>x</sub> with NH<sub>3</sub> at low temperatures, *Chem. Eng. J.*, 2014, **250**, 390-398.
13. H. Lai, J. S. Deng, S. M. Wen and Q. J. Liu, Elucidation of lead ions adsorption mechanism on marmatite surface by PCA-assisted ToF-SIMS, XPS and zeta potential, *Miner. Eng.*, 2019, **144**, 106035.
14. M. A. Hampton, C. Plackowski and A. V. Nguyen, Physical and chemical analysis of elemental sulfur formation during galena surface oxidation, *Langmuir*, 2011, **27**, 4190-4201.
15. Y. L. Mikhlin, A. A. Karacharov and M. N. Likhatski, Effect of adsorption of butyl xanthate on galena, PbS, and HOPG surfaces as studied by atomic force microscopy and spectroscopy and XPS, *Internat. J. Miner. Process.*, 2015, **144**, 81-89.
16. J. T. Bi, X. Huang, J. K. Wang, T. Wang, H. Wu, J. Y. Yang, H. J. Lu and H. X. Hao, Oil-phase cyclic magnetic adsorption to synthesize Fe<sub>3</sub>O<sub>4</sub>@C@TiO<sub>2</sub>-nanotube composites for

- simultaneous removal of Pb(II) and Rhodamine B, *Chem. Eng. J.*, 2019, **366**, 50-61.
17. J. Liu, M. Ejtemaei, A. V. Nguyen, S. M. Wen and Y. Zeng, Surface chemistry of Pb-activated sphalerite, *Miner. Eng.*, 2020, **145**.
  18. Z. Lv, Z. Chen, Q. Yu, W. Zhu, H. You, B. Chen, Z. Zheng, Y. Liu and Q. Hu, Micro-area investigation on electrochemical performance improvement with Co and Mn doping in PbO<sub>2</sub> electrode materials, *RSC Adv.*, 2021, **11**, 28949-28960.
  19. L. R. Pederson, Two-dimensional chemical-state plot for lead using XPS, *J. Electron Spectrosc.*, 1982, **28**, 203-209.
  20. P. U, A. Gowda K M, E. M G, S. T B, N. N and R. M B, Biologically synthesized PbS nanoparticles for the detection of arsenic in water, *Int. Biodeter. Biodegr.*, 2017, **119**, 78-86.
  21. M. Suganya, S. Anitha, D. Prabha, S. Balamurugan, J. Srivind and A. R. Balu, Enhanced photocatalytic and antifungal properties of Sr-doped PbS nanopowders, *Mater. Technol.*, 2017, **33**, 214-219.
  22. Y. R. Zhao, J. L. Wang, A. Z. Pan, L. He and S. Simon, Degradation of red lead pigment in the oil painting during UV aging, *Color Res. Appl.*, 2019, **44**, 790-797.
  23. D. Sister and E. Minopoulou, A study of smalt and red lead discolouration in Antiphonitis wall paintings in Cyprus, *Appl. Phys. A-Mater.*, 2009, **96**, 701-711.
  24. F. H. ElBatal, M. A. Marzouk, H. A. ElBatal and F. M. EzzElDin, Impact effect of gamma irradiation on the optical, FTIR, ESR spectral properties and thermal behavior of some mixed (PbO + Bi<sub>2</sub>O<sub>3</sub>) borate glasses searching for shielding effects, *J. Mol. Struct.*, 2022, **1267**.
  25. J. J. Boon, F. Hoogland, K. Keune and H. M. Parkin, in *AIC Paintings Specialty Group Postprints*, 2006, vol. 19, pp. 16-23.
  26. L. H. Xu, J. Tian, H. Q. Wu, Z. Y. Lu, Y. H. Yang, W. Sun and Y. H. Hu, Effect of Pb 2+ ions on ilmenite flotation and adsorption of benzohydroxamic acid as a collector, *Appl. Surf. Sci.*, 2017, **425**, 796-802.
  27. D. H. Lee and S. Condrate, FTIR spectral characterization of thin film coatings of oleic acid on glasses: I. Coatings on glasses from ethyl alcohol, *J. Mater. Sci.*, 1999, **34**, 139-146.
  28. C. Liné, J. Reyes-Herrera, M. Bakshi, M. Wazne, V. Costa, D. Roujol, E. Jamet, H. Castillo-Michel, E. Flahaut and C. Larue, Fourier transform infrared spectroscopy contribution to disentangle nanomaterial (DWCNT, TiO<sub>2</sub>) impacts on tomato plants, *Environ. Sci.-Nano*, 2021, **8**, 2920-2931.
  29. S. V. Ovsyannikov, V. V. Shchennikov, A. Cantarero, A. Cros and A. N. Titov, Raman spectra of (PbS)<sub>1.18</sub>(TiS<sub>2</sub>)<sub>2</sub> misfit compound, *Mat. Sci. Eng. A-Struct.*, 2007, **462**, 422-426.
  30. M. S. Pawar, P. K. Bankar, M. A. More and D. J. Late, PbS Nanostar-Like Structures as Field Emitters, *ChemistrySelect*, 2017, **2**, 5175-5179.
  31. G. D. Smith, S. Firth, R. J. H. Clark and M. Cardona, First- and second-order Raman spectra of galena (PbS), *J. Appl. Phys.*, 2002, **92**, 4375-4380.
  32. J. P. Ge, J. Wang, H. X. Zhang, X. Wang, Q. Peng and Y. D. Li, Orthogonal PbS nanowire arrays and networks and their Raman scattering behavior, *Chem.-Eur. J.*, 2005, **11**, 1889-1894.
  33. D. P. Guo, C. Robinson and J. E. Herrera, Mechanism of dissolution of minium (Pb<sub>3</sub>O<sub>4</sub>) in water under depleting chlorine conditions, *Corros. Sci.*, 2016, **103**, 42-49.
  34. G. Trettenhahn, G. Nauer and A. Neckel, Vibrational spectroscopy on the PbO-PbSO<sub>4</sub> system and some related compounds: part 1. Fundamentals, infrared and Raman spectroscopy, *Vib. spectrosc.*, 1993, **5**, 85-100.
  35. H. G. Edwards, D. W. Farwell, E. M. Newton and F. R. Perez, Minium; FT-Raman non-destructive analysis applied to an historical controversy, *Analyst*, 1999, **124**, 1323-1326.

36. L. Burgio, R. J. Clark and S. Firth, Raman spectroscopy as a means for the identification of plattnerite ( $\text{PbO}_2$ ), of lead pigments and of their degradation products, *Analyst*, 2001, **126**, 222-227.
